# Supplementary material for: The gas-phase structure of octaphenyloctasilsesquioxane Si8O12Ph8 and the crystal structures of Si8O12(p-tolyl)8 and Si8O12(p-ClCH2C6H4)8
Source: Royal Society of Chemistry journal article supplement (doi:10.1039/c000664e), 2010-01-01

# The gas-phase structure of octaphenyloctasilsesquioxane $\text{Si}_8\text{O}_{12}\text{Ph}_8$ and the crystal structures of $\text{Si}_8\text{O}_{12}(\textit{p}\text{-tolyl})_8$ and $\text{Si}_8\text{O}_{12}(\textit{p}\text{-ClCH}_2\text{C}_6\text{H}_4)_8$

Alexander V. Zakharov,<sup>ab\*</sup> Sarah L. Masters,<sup>b\*</sup> Derek A. Wann,<sup>b</sup> Sergei A. Shlykov,<sup>a</sup> Georgiy V. Girichev,<sup>a</sup> Sophie Arrowsmith,<sup>c</sup> David B. Cordes,<sup>c</sup> Paul D. Lickiss,<sup>c\*</sup> and Andrew J. P. White<sup>c</sup>

<sup>a</sup> Department of Physics, Ivanovo State University of Chemistry and Technology, Engelsa 7, Ivanovo, 153000, Russian Federation. E-mail: a\_zakharov@isuct.ru

<sup>b</sup> School of Chemistry, University of Edinburgh, West Mains Road, Edinburgh, UK EH9 3JJ. E-mail: s.masters@ed.ac.uk

<sup>c</sup> Department of Chemistry, Imperial College London, South Kensington, London, UK SW7 2AZ. E-mail: p.lickiss@imperial.ac.uk

## Supplementary Information

### The X-ray crystal structure of $\text{Si}_8\text{O}_{12}(\textit{p}\text{-tolyl})_8$ (**2**)

The included solvent was found to be highly disordered, and the best approach to handling this electron density was found to be the SQUEEZE routine of PLATON.<sup>45</sup> This suggested a total of 809 electrons per unit cell, equivalent to approximately 51 electrons per asymmetric unit. The crystal was grown from a 3:1 mixture of acetone [ $\text{Me}_2\text{C}=\text{O}$ ,  $\text{C}_3\text{H}_6\text{O}$ , 32 electrons] and dichloromethane [ $\text{CH}_2\text{Cl}_2$ , 42 electrons]. The shape and flat electron density profile of the residual electron density peaks observed in the disordered solvent region before the use of SQUEEZE suggest that the included solvent is slightly more likely to be acetone rather than dichloromethane. 51 electrons equates to *ca.* 1.5 acetone molecules (48 electrons), and so this interpretation of the included solvent was used for the calculations of the contents of the asymmetric unit. The equates to 6 acetone molecules per cage.

As a result of the absence of the solvent atoms from the asymmetric unit, the atom list is low by  $\text{C}_{4.5}\text{H}_9\text{O}_{1.5}$  (and the unit cell low by  $\text{C}_{72}\text{H}_{144}\text{O}_{24}$ ) compared to what is actually presumed to be present. The middle of the cage is at a  $2/m$  special position. The structure of the asymmetric unit of **2**, showing 30% probability ellipsoids, is shown in Figure S2 below.

### The X-ray crystal structure of $\text{Si}_8\text{O}_{12}(\textit{p}\text{-ClCH}_2\text{C}_6\text{H}_4)_8$ (**3**)

Disorder was found for two of the eight chlorobenzyl moieties in the structure of **3**. For the Si(5)-bound unit, three partial occupancy orientations of *ca.* 49, 31 and 20% occupancy were identified, their geometries optimised, and only the chlorine atoms were refined anisotropically. For the Si(8)-bound unit, two partial occupancy orientations of *ca.* 60 and 40% occupancy were identified, their geometries optimised, and the non-hydrogen atoms of the major occupancy orientation were refined anisotropically (the others were refined isotropically).

The crystals of **3** were very weak scatterers of X-rays, so the target resolution of the data collection was trimmed to 0.90 Å with 98.5% completeness. Despite these measures, the three-day data collection resulted in a data set that was only 97% complete. The molecular structure of **3**, showing 30% probability ellipsoids, is shown in Figure S3 below.

**Table S1** Nozzle-to-camera distances (mm), temperatures (K), accelerating voltages (kV), individual *R* factors (%), scale factors and electron wavelengths (Å<sup>-1</sup>) used in the GED study of Si<sub>8</sub>O<sub>12</sub>Ph<sub>8</sub> (**1**).

|                          |         |         |
|--------------------------|---------|---------|
| Nozzle-to-plate distance | 338     | 598     |
| Temperature              | 615(10) | 615(10) |
| Accelerating Voltage     | 74.2    | 72.9    |
| <i>R</i> factor          | 5.7     | 4.7     |
| Scale factor             | 1.18    | 1.46    |
| Electron wavelength      | 0.04350 | 0.04390 |

**Table S2** Cartesian coordinates for the calculated [B3LYP/cc-pVTZ] structure of **1**.

|       | <i>x</i> | <i>y</i> | <i>z</i> |
|-------|----------|----------|----------|
| Si(1) | -1.5613  | 1.5996   | 1.5786   |
| Si(2) | -1.5996  | -1.5613  | 1.5786   |
| Si(3) | 1.5613   | -1.5996  | 1.5786   |
| Si(4) | 1.5996   | -1.5613  | -1.5786  |
| Si(5) | 1.5613   | 1.5996   | -1.5786  |
| Si(6) | -1.5996  | 1.5613   | -1.5786  |
| Si(7) | -1.5613  | -1.5996  | -1.5786  |
| Si(8) | 1.5996   | 1.5613   | 1.5786   |
| O(9)  | -1.8922  | 1.8922   | 0.0000   |
| O(10) | -1.8922  | -1.8922  | 0.0000   |
| O(11) | 1.8922   | -1.8922  | 0.0000   |
| O(12) | 1.8922   | 1.8922   | 0.0000   |
| O(13) | 0.0203   | 1.8860   | 1.8883   |
| O(14) | -1.8860  | 0.0203   | 1.8883   |
| O(15) | -0.0203  | -1.8860  | 1.8883   |
| O(16) | 1.8860   | 0.0203   | -1.8883  |
| O(17) | -0.0203  | 1.8860   | -1.8883  |
| O(18) | -1.8860  | -0.0203  | -1.8883  |
| O(19) | 0.0203   | -1.8860  | -1.8883  |
| O(20) | 1.8860   | -0.0203  | 1.8883   |
| C(21) | -2.6078  | 2.6984   | 2.6485   |
| C(22) | -2.6984  | -2.6078  | 2.6485   |
| C(23) | 2.6078   | -2.6984  | 2.6485   |
| C(24) | 2.6984   | -2.6078  | -2.6485  |
| C(25) | 2.6078   | 2.6984   | -2.6485  |
| C(26) | -2.6984  | 2.6078   | -2.6485  |
| C(27) | -2.6078  | -2.6984  | -2.6485  |
| C(28) | 2.6984   | 2.6078   | 2.6485   |
| C(29) | -3.9376  | 2.9755   | 2.3062   |
| C(30) | -2.9755  | -3.9376  | 2.3062   |
| C(31) | 3.9376   | -2.9755  | 2.3062   |
| C(32) | 2.9755   | -3.9376  | -2.3062  |

|       |         |         |         |
|-------|---------|---------|---------|
| C(33) | 3.9376  | 2.9755  | -2.3062 |
| C(34) | -2.9755 | 3.9376  | -2.3062 |
| C(35) | -3.9376 | -2.9755 | -2.3062 |
| C(36) | 2.9755  | 3.9376  | 2.3062  |
| C(37) | -2.0993 | 3.2524  | 3.8294  |
| C(38) | -3.2524 | -2.0993 | 3.8294  |
| C(39) | 2.0993  | -3.2524 | 3.8294  |
| C(40) | 3.2524  | -2.0993 | -3.8294 |
| C(41) | 2.0993  | 3.2524  | -3.8294 |
| C(42) | -3.2524 | 2.0993  | -3.8294 |
| C(43) | -2.0993 | -3.2524 | -3.8294 |
| C(44) | 3.2524  | 2.0993  | 3.8294  |
| C(45) | -4.7334 | 3.7749  | 3.1178  |
| C(46) | -3.7749 | -4.7334 | 3.1178  |
| C(47) | 4.7334  | -3.7749 | 3.1178  |
| C(48) | 3.7749  | -4.7334 | -3.1178 |
| C(49) | 4.7334  | 3.7749  | -3.1178 |
| C(50) | -3.7749 | 4.7334  | -3.1178 |
| C(51) | -4.7334 | -3.7749 | -3.1178 |
| C(52) | 3.7749  | 4.7334  | 3.1178  |
| C(53) | -2.8933 | 4.0522  | 4.6437  |
| C(54) | -4.0522 | -2.8933 | 4.6437  |
| C(55) | 2.8933  | -4.0522 | 4.6437  |
| C(56) | 4.0522  | -2.8933 | -4.6437 |
| C(57) | 2.8933  | 4.0522  | -4.6437 |
| C(58) | -4.0522 | 2.8933  | -4.6437 |
| C(59) | -2.8933 | -4.0522 | -4.6437 |
| C(60) | 4.0522  | 2.8933  | 4.6437  |
| C(61) | -4.2119 | 4.3134  | 4.2894  |
| C(62) | -4.3134 | -4.2119 | 4.2894  |
| C(63) | 4.2119  | -4.3134 | 4.2894  |
| C(64) | 4.3134  | -4.2119 | -4.2894 |
| C(65) | 4.2119  | 4.3134  | -4.2894 |
| C(66) | -4.3134 | 4.2119  | -4.2894 |
| C(67) | -4.2119 | -4.3134 | -4.2894 |
| C(68) | 4.3134  | 4.2119  | 4.2894  |
| H(69) | -4.3550 | 2.5704  | 1.3928  |
| H(70) | -2.5704 | -4.3550 | 1.3928  |
| H(71) | 4.3550  | -2.5704 | 1.3928  |
| H(72) | 2.5704  | -4.3550 | -1.3928 |
| H(73) | 4.3550  | 2.5704  | -1.3928 |
| H(74) | -2.5704 | 4.3550  | -1.3928 |
| H(75) | -4.3550 | -2.5704 | -1.3928 |
| H(76) | 2.5704  | 4.3550  | 1.3928  |
| H(77) | -1.0711 | 3.0645  | 4.1106  |
| H(78) | -3.0645 | -1.0711 | 4.1106  |
| H(79) | 1.0711  | -3.0645 | 4.1106  |
| H(80) | 3.0645  | -1.0711 | -4.1106 |
| H(81) | 1.0711  | 3.0645  | -4.1106 |
| H(82) | -3.0645 | 1.0711  | -4.1106 |
| H(83) | -1.0711 | -3.0645 | -4.1106 |
| H(84) | 3.0645  | 1.0711  | 4.1106  |

|        |         |         |         |
|--------|---------|---------|---------|
| H(85)  | -5.7581 | 3.9798  | 2.8355  |
| H(86)  | -3.9798 | -5.7581 | 2.8355  |
| H(87)  | 5.7581  | -3.9798 | 2.8355  |
| H(88)  | 3.9798  | -5.7581 | -2.8355 |
| H(89)  | 5.7581  | 3.9798  | -2.8355 |
| H(90)  | -3.9798 | 5.7581  | -2.8355 |
| H(91)  | -5.7581 | -3.9798 | -2.8355 |
| H(92)  | 3.9798  | 5.7581  | 2.8355  |
| H(93)  | -2.4817 | 4.4740  | 5.5516  |
| H(94)  | -4.4740 | -2.4817 | 5.5516  |
| H(95)  | 2.4817  | -4.4740 | 5.5516  |
| H(96)  | 4.4740  | -2.4817 | -5.5516 |
| H(97)  | 2.4817  | 4.4740  | -5.5516 |
| H(98)  | -4.4740 | 2.4817  | -5.5516 |
| H(99)  | -2.4817 | -4.4740 | -5.5516 |
| H(100) | 4.4740  | 2.4817  | 5.5516  |
| H(101) | -4.8304 | 4.9375  | 4.9217  |
| H(102) | -4.9375 | -4.8304 | 4.9217  |
| H(103) | 4.8304  | -4.9375 | 4.9217  |
| H(104) | 4.9375  | -4.8304 | -4.9217 |
| H(105) | 4.8304  | 4.9375  | -4.9217 |
| H(106) | -4.9375 | 4.8304  | -4.9217 |
| H(107) | -4.8304 | -4.9375 | -4.9217 |
| H(108) | 4.9375  | 4.8304  | 4.9217  |

---

Energy = -5072.4567 Hartrees

**Table S3** Cartesian coordinates for the GED-refined structure of **1**.

|       | <i>x</i> | <i>y</i> | <i>z</i> |
|-------|----------|----------|----------|
| Si(1) | -1.5616  | 1.5999   | 1.5790   |
| Si(2) | -1.5999  | -1.5616  | 1.5790   |
| Si(3) | 1.5616   | -1.5999  | 1.5790   |
| Si(4) | 1.5999   | -1.5616  | -1.5790  |
| Si(5) | 1.5616   | 1.5999   | -1.5790  |
| Si(6) | -1.5999  | 1.5616   | -1.5790  |
| Si(7) | -1.5616  | -1.5999  | -1.5790  |
| Si(8) | 1.5999   | 1.5616   | 1.5790   |
| O(9)  | -1.9059  | 1.9059   | 0.0000   |
| O(10) | -1.9059  | -1.9059  | 0.0000   |
| O(11) | 1.9059   | -1.9059  | 0.0000   |
| O(12) | 1.9059   | 1.9059   | 0.0000   |
| O(13) | 0.0188   | 1.8837   | 1.8801   |
| O(14) | -1.8837  | 0.0188   | 1.8801   |
| O(15) | -0.0188  | -1.8837  | 1.8801   |
| O(16) | 1.8837   | 0.0188   | -1.8801  |
| O(17) | -0.0188  | 1.8837   | -1.8801  |
| O(18) | -1.8837  | -0.0188  | -1.8801  |
| O(19) | 0.0188   | -1.8837  | -1.8801  |
| O(20) | 1.8837   | -0.0188  | 1.8801   |
| C(21) | -2.6251  | 2.6920   | 2.6420   |
| C(22) | -2.6920  | -2.6251  | 2.6420   |
| C(23) | 2.6251   | -2.6920  | 2.6420   |
| C(24) | 2.6920   | -2.6251  | -2.6420  |

|       |         |         |         |
|-------|---------|---------|---------|
| C(25) | 2.6251  | 2.6920  | -2.6420 |
| C(26) | -2.6920 | 2.6251  | -2.6420 |
| C(27) | -2.6251 | -2.6920 | -2.6420 |
| C(28) | 2.6920  | 2.6251  | 2.6420  |
| C(29) | -3.9383 | 2.9662  | 2.2579  |
| C(30) | -2.9662 | -3.9383 | 2.2579  |
| C(31) | 3.9383  | -2.9662 | 2.2579  |
| C(32) | 2.9662  | -3.9383 | -2.2579 |
| C(33) | 3.9383  | 2.9662  | -2.2579 |
| C(34) | -2.9662 | 3.9383  | -2.2579 |
| C(35) | -3.9383 | -2.9662 | -2.2579 |
| C(36) | 2.9662  | 3.9383  | 2.2579  |
| C(37) | -2.1746 | 3.2171  | 3.8528  |
| C(38) | -3.2171 | -2.1746 | 3.8528  |
| C(39) | 2.1746  | -3.2171 | 3.8528  |
| C(40) | 3.2171  | -2.1746 | -3.8528 |
| C(41) | 2.1746  | 3.2171  | -3.8528 |
| C(42) | -3.2171 | 2.1746  | -3.8528 |
| C(43) | -2.1746 | -3.2171 | -3.8528 |
| C(44) | 3.2171  | 2.1746  | 3.8528  |
| C(45) | -4.7850 | 3.7301  | 3.0424  |
| C(46) | -3.7301 | -4.7850 | 3.0424  |
| C(47) | 4.7850  | -3.7301 | 3.0424  |
| C(48) | 3.7301  | -4.7850 | -3.0424 |
| C(49) | 4.7850  | 3.7301  | -3.0424 |
| C(50) | -3.7301 | 4.7850  | -3.0424 |
| C(51) | -4.7850 | -3.7301 | -3.0424 |
| C(52) | 3.7301  | 4.7850  | 3.0424  |
| C(53) | -3.0113 | 3.9826  | 4.6479  |
| C(54) | -3.9826 | -3.0113 | 4.6479  |
| C(55) | 3.0113  | -3.9826 | 4.6479  |
| C(56) | 3.9826  | -3.0113 | -4.6479 |
| C(57) | 3.0113  | 3.9826  | -4.6479 |
| C(58) | -3.9826 | 3.0113  | -4.6479 |
| C(59) | -3.0113 | -3.9826 | -4.6479 |
| C(60) | 3.9826  | 3.0113  | 4.6479  |
| C(61) | -4.3286 | 4.2439  | 4.2454  |
| C(62) | -4.2439 | -4.3286 | 4.2454  |
| C(63) | 4.3286  | -4.2439 | 4.2454  |
| C(64) | 4.2439  | -4.3286 | -4.2454 |
| C(65) | 4.3286  | 4.2439  | -4.2454 |
| C(66) | -4.2439 | 4.3286  | -4.2454 |
| C(67) | -4.3286 | -4.2439 | -4.2454 |
| C(68) | 4.2439  | 4.3286  | 4.2454  |
| H(69) | -4.3130 | 2.5869  | 1.3264  |
| H(70) | -2.5869 | -4.3130 | 1.3264  |
| H(71) | 4.3130  | -2.5869 | 1.3264  |
| H(72) | 2.5869  | -4.3130 | -1.3264 |
| H(73) | 4.3130  | 2.5869  | -1.3264 |
| H(74) | -2.5869 | 4.3130  | -1.3264 |
| H(75) | -4.3130 | -2.5869 | -1.3264 |
| H(76) | 2.5869  | 4.3130  | 1.3264  |

|        |         |         |         |
|--------|---------|---------|---------|
| H(77)  | -1.1660 | 3.0341  | 4.1690  |
| H(78)  | -3.0341 | -1.1660 | 4.1690  |
| H(79)  | 1.1660  | -3.0341 | 4.1690  |
| H(80)  | 3.0341  | -1.1660 | -4.1690 |
| H(81)  | 1.1660  | 3.0341  | -4.1690 |
| H(82)  | -3.0341 | 1.1660  | -4.1690 |
| H(83)  | -1.1660 | -3.0341 | -4.1690 |
| H(84)  | 3.0341  | 1.1660  | 4.1690  |
| H(85)  | -5.7883 | 3.9233  | 2.7155  |
| H(86)  | -3.9233 | -5.7883 | 2.7155  |
| H(87)  | 5.7883  | -3.9233 | 2.7155  |
| H(88)  | 3.9233  | -5.7883 | -2.7155 |
| H(89)  | 5.7883  | 3.9233  | -2.7155 |
| H(90)  | -3.9233 | 5.7883  | -2.7155 |
| H(91)  | -5.7883 | -3.9233 | -2.7155 |
| H(92)  | 3.9233  | 5.7883  | 2.7155  |
| H(93)  | -2.6494 | 4.3818  | 5.5754  |
| H(94)  | -4.3818 | -2.6494 | 5.5754  |
| H(95)  | 2.6494  | -4.3818 | 5.5754  |
| H(96)  | 4.3818  | -2.6494 | -5.5754 |
| H(97)  | 2.6494  | 4.3818  | -5.5754 |
| H(98)  | -4.3818 | 2.6494  | -5.5754 |
| H(99)  | -2.6494 | -4.3818 | -5.5754 |
| H(100) | 4.3818  | 2.6494  | 5.5754  |
| H(101) | -4.9792 | 4.8379  | 4.8576  |
| H(102) | -4.8379 | -4.9792 | 4.8576  |
| H(103) | 4.9792  | -4.8379 | 4.8576  |
| H(104) | 4.8379  | -4.9792 | -4.8576 |
| H(105) | 4.9792  | 4.8379  | -4.8576 |
| H(106) | -4.8379 | 4.9792  | -4.8576 |
| H(107) | -4.9792 | -4.8379 | -4.8576 |
| H(108) | 4.8379  | 4.9792  | 4.8576  |

**Table S4** First least-squares correlation matrix ( $\times 100$ ) for  $\text{Si}_8\text{O}_{12}\text{Ph}_8$ .<sup>a</sup>

|       |       |       |
|-------|-------|-------|
|       | $p_1$ | $p_4$ |
| $p_5$ |       | -79.2 |
| $p_6$ | -70.6 |       |

<sup>a</sup> Only elements with absolute values  $\geq 50\%$  are shown.

**Table S5** Second least-squares correlation matrix ( $\times 100$ ) for  $\text{Si}_8\text{O}_{12}\text{Ph}_8$ .<sup>a</sup>

|          |       |          |          |          |          |
|----------|-------|----------|----------|----------|----------|
|          | $p_9$ | $p_{12}$ | $p_{14}$ | $p_{16}$ | $p_{18}$ |
| $p_{13}$ | 81.9  | -50.8    |          |          |          |
| $p_{14}$ |       | -95.0    |          |          |          |
| $p_{18}$ |       | -53.8    | 63.2     | -80.0    |          |
| $p_{20}$ |       | -51.6    |          | -98.2    | 85.1     |

<sup>a</sup> Only elements with absolute values  $\geq 50\%$  are shown.

**Table S6** Interatomic distances ( $r_a / \text{\AA}$ ), experimental and theoretical amplitudes of vibration ( $u_{h1} / \text{\AA}$ ), and  $k_{h1}$  values for the GED structure of  $\text{Si}_8\text{O}_{12}\text{Ph}_8$  (**1**).<sup>a,b</sup>

|          | Atom pair      | $r_a$       | Expt. $u_{h1}$            | Calc. $u_{h1}$ | $k_{h1}$ |
|----------|----------------|-------------|---------------------------|----------------|----------|
| $u_1$    | C(37)-H(77)    | 1.0705(16)  | 0.0540(23)                | 0.0828         | 0.0022   |
| $u_2$    | C(61)-H(101)   | 1.0717(16)  | 0.0468(tied to $u_1$ )    | 0.0756         | 0.0011   |
| $u_3$    | C(29)-H(69)    | 1.0711(16)  | 0.0544(tied to $u_1$ )    | 0.0832         | 0.0023   |
| $u_4$    | C(29)-C(45)    | 1.3840(16)  | 0.0318(7)                 | 0.0475         | 0.0001   |
| $u_5$    | C(53)-C(61)    | 1.4003(88)  | 0.0479(tied to $u_4$ )    | 0.0637         | 0.0016   |
| $u_6$    | C(37)-C(53)    | 1.3849(16)  | 0.0318(tied to $u_4$ )    | 0.0476         | 0.0001   |
| $u_7$    | C(45)-C(61)    | 1.3840(16)  | 0.0472(tied to $u_4$ )    | 0.0629         | 0.0015   |
| $u_8$    | C(21)-C(37)    | 1.3930(16)  | 0.0480(tied to $u_4$ )    | 0.0638         | 0.0016   |
| $u_9$    | C(21)-C(29)    | 1.3937(16)  | 0.0494(tied to $u_4$ )    | 0.0652         | 0.0018   |
| $u_{10}$ | Si(1)-O(13)    | 1.6334(49)  | 0.0391(6)                 | 0.0545         | 0.0003   |
| $u_{11}$ | Si(1)-O(9)     | 1.6446(62)  | 0.0389(tied to $u_{10}$ ) | 0.0543         | 0.0001   |
| $u_{12}$ | Si(1)-O(14)    | 1.6414(79)  | 0.0395(tied to $u_{10}$ ) | 0.0549         | 0.0000   |
| $u_{13}$ | Si(1)-C(21)    | 1.8597(14)  | 0.0455(20)                | 0.0585         | -0.0014  |
| $u_{14}$ | C(45)...H(69)  | 2.1166(141) | 0.0824(30)                | 0.1149         | -0.0013  |
| $u_{15}$ | C(53)...H(77)  | 2.1306(135) | 0.0811(tied to $u_{14}$ ) | 0.1137         | -0.0012  |
| $u_{16}$ | C(29)...H(85)  | 2.1340(19)  | 0.0842(tied to $u_{14}$ ) | 0.1168         | -0.0015  |
| $u_{17}$ | C(37)...H(93)  | 2.1331(19)  | 0.0823(tied to $u_{14}$ ) | 0.1148         | -0.0001  |
| $u_{18}$ | C(61)...H(93)  | 2.1156(150) | 0.0754(tied to $u_{14}$ ) | 0.108          | 0.0309   |
| $u_{19}$ | C(53)...H(101) | 2.1593(85)  | 0.0879(tied to $u_{14}$ ) | 0.1205         | -0.0033  |
| $u_{20}$ | C(45)...H(101) | 2.1380(19)  | 0.0855(tied to $u_{14}$ ) | 0.1181         | -0.0026  |
| $u_{21}$ | C(61)...H(85)  | 2.1077(142) | 0.0761(tied to $u_{14}$ ) | 0.1086         | 0.0311   |
| $u_{22}$ | C(21)...H(77)  | 2.1109(19)  | 0.0759(tied to $u_{14}$ ) | 0.1084         | 0.0287   |
| $u_{23}$ | C(21)...H(69)  | 2.1123(19)  | 0.0759(tied to $u_{14}$ ) | 0.1085         | 0.0303   |
| $u_{24}$ | C(29)...C(37)  | 2.3624(57)  | 0.0564(11)                | 0.0733         | 0.0287   |
| $u_{25}$ | C(45)...C(53)  | 2.3755(93)  | 0.0558(tied to $u_{24}$ ) | 0.0727         | 0.0302   |
| $u_{26}$ | C(29)...C(61)  | 2.4018(177) | 0.0699(tied to $u_{24}$ ) | 0.0868         | -0.0070  |
| $u_{27}$ | C(37)...C(61)  | 2.4263(137) | 0.0731(tied to $u_{24}$ ) | 0.09           | -0.0080  |
| $u_{28}$ | C(21)...C(53)  | 2.4215(150) | 0.0700(tied to $u_{24}$ ) | 0.0869         | -0.0052  |
| $u_{29}$ | C(21)...C(45)  | 2.4361(138) | 0.0741(tied to $u_{24}$ ) | 0.091          | -0.0064  |
| $u_{30}$ | H(69)...H(85)  | 2.4125(211) | 0.1676(fixed)             | 0.1676         | 0.0148   |
| $u_{31}$ | H(77)...H(93)  | 2.4338(206) | 0.1678(fixed)             | 0.1678         | 0.0147   |
| $u_{32}$ | O(9)...O(14)   | 2.6530(35)  | 0.1057(23)                | 0.1117         | 0.0109   |
| $u_{33}$ | O(13)...O(14)  | 2.6534(62)  | 0.1072(tied to $u_{32}$ ) | 0.1132         | 0.0107   |
| $u_{34}$ | O(9)...O(13)   | 2.6789(73)  | 0.1056(tied to $u_{32}$ ) | 0.1116         | 0.0118   |
| $u_{35}$ | O(13)...H(77)  | 3.0445(513) | 0.6963(fixed)             | 0.6963         | -0.2221  |
| $u_{36}$ | C(29)...C(53)  | 2.7526(224) | 0.1019(12)                | 0.1143         | 0.0050   |
| $u_{37}$ | C(37)...C(45)  | 2.7729(270) | 0.0978(tied to $u_{36}$ ) | 0.1102         | 0.0082   |
| $u_{38}$ | C(21)...C(61)  | 2.7953(55)  | 0.0598(tied to $u_{36}$ ) | 0.0722         | 0.0121   |
| $u_{39}$ | Si(1)...C(29)  | 2.8265(108) | 0.1073(tied to $u_{36}$ ) | 0.1197         | -0.0022  |
| $u_{40}$ | Si(1)...C(37)  | 2.8571(114) | 0.1012(tied to $u_{36}$ ) | 0.1136         | -0.0003  |
| $u_{41}$ | O(13)...C(21)  | 2.8670(279) | 0.0993(tied to $u_{36}$ ) | 0.1117         | 0.0006   |

|          |                |              |                           |        |         |
|----------|----------------|--------------|---------------------------|--------|---------|
| $u_{42}$ | O(9)...C(21)   | 2.8477(146)  | 0.1053(tied to $u_{36}$ ) | 0.1177 | 0.0010  |
| $u_{43}$ | O(13)...C(28)  | 2.8749(140)  | 0.1051(tied to $u_{36}$ ) | 0.1176 | 0.0019  |
| $u_{44}$ | O(9)...H(69)   | 2.8876(539)  | 0.8249(fixed)             | 0.8248 | -0.0561 |
| $u_{45}$ | Si(1)...H(69)  | 2.9310(173)  | 0.2202(fixed)             | 0.2202 | 0.0030  |
| $u_{46}$ | Si(1)...H(77)  | 2.9854(210)  | 0.2167(fixed)             | 0.2167 | 0.0016  |
| $u_{47}$ | Si(1)...Si(6)  | 3.1184(8)    | 0.0904(15)                | 0.109  | 0.0400  |
| $u_{48}$ | Si(1)...Si(2)  | 3.1215(8)    | 0.0918(tied to $u_{47}$ ) | 0.1104 | 0.0403  |
| $u_{49}$ | O(13)...C(37)  | 3.3867(386)  | 0.5061(667)               | 0.3694 | -0.1494 |
| $u_{50}$ | O(9)...C(29)   | 3.3044(419)  | 0.5743(tied to $u_{49}$ ) | 0.4377 | -0.0867 |
| $u_{51}$ | C(61)...H(69)  | 3.3590(214)  | 0.1149(58)                | 0.1535 | -0.0024 |
| $u_{52}$ | C(61)...H(77)  | 3.3891(184)  | 0.1135(tied to $u_{51}$ ) | 0.1522 | -0.0021 |
| $u_{53}$ | C(29)...H(77)  | 3.3228(49)   | 0.0759(tied to $u_{51}$ ) | 0.1146 | 0.0451  |
| $u_{54}$ | C(53)...H(85)  | 3.3357(158)  | 0.0766(tied to $u_{51}$ ) | 0.1153 | 0.0480  |
| $u_{55}$ | C(45)...H(93)  | 3.3296(104)  | 0.0760(tied to $u_{51}$ ) | 0.1147 | 0.0470  |
| $u_{56}$ | C(29)...H(101) | 3.3628(131)  | 0.0710(tied to $u_{51}$ ) | 0.1096 | 0.0054  |
| $u_{57}$ | C(37)...H(69)  | 3.3238(49)   | 0.0762(tied to $u_{51}$ ) | 0.1148 | 0.0456  |
| $u_{58}$ | C(37)...H(101) | 3.3880(97)   | 0.0747(tied to $u_{51}$ ) | 0.1133 | 0.0036  |
| $u_{59}$ | C(21)...H(93)  | 3.3855(109)  | 0.1131(tied to $u_{51}$ ) | 0.1517 | 0.0000  |
| $u_{60}$ | C(21)...H(85)  | 3.3962(95)   | 0.1181(tied to $u_{51}$ ) | 0.1568 | -0.0010 |
| $u_{61}$ | O(13)...H(76)  | 3.3314(484)  | 0.8694(tied to $u_{51}$ ) | 0.908  | 0.2468  |
| $u_{62}$ | O(13)...C(36)  | 3.5436(332)  | 0.3462(225)               | 0.5006 | 0.0691  |
| $u_{63}$ | H(69)...H(74)  | 1.4677(2156) | 2.9385(tied to $u_{51}$ ) | 2.9771 | 2.1372  |
| $u_{64}$ | O(13)...O(15)  | 3.6728(88)   | 0.2650(tied to $u_{62}$ ) | 0.4193 | 0.0948  |
| $u_{65}$ | O(13)...C(44)  | 3.6638(313)  | 0.3063(tied to $u_{62}$ ) | 0.4606 | 0.1052  |
| $u_{66}$ | O(13)...O(17)  | 3.6658(261)  | 0.2563(tied to $u_{62}$ ) | 0.4106 | 0.0946  |
| $u_{67}$ | O(9)...O(10)   | 3.7207(313)  | 0.2542(tied to $u_{62}$ ) | 0.4086 | 0.0911  |
| $u_{68}$ | Si(1)...O(17)  | 3.7395(134)  | 0.3082(84)                | 0.2268 | 0.0587  |
| $u_{69}$ | Si(1)...O(12)  | 3.7658(154)  | 0.3049(tied to $u_{68}$ ) | 0.2235 | 0.0566  |
| $u_{70}$ | Si(1)...O(20)  | 3.7606(36)   | 0.3084(tied to $u_{68}$ ) | 0.227  | 0.0579  |
| $u_{71}$ | Si(1)...O(15)  | 3.7629(70)   | 0.3123(tied to $u_{68}$ ) | 0.2309 | 0.0590  |
| $u_{72}$ | Si(1)...O(18)  | 3.7741(111)  | 0.3036(tied to $u_{68}$ ) | 0.2222 | 0.0585  |
| $u_{73}$ | Si(1)...O(10)  | 3.8025(155)  | 0.3061(tied to $u_{68}$ ) | 0.2248 | 0.0578  |
| $u_{74}$ | O(13)...H(84)  | 3.5934(557)  | 0.7661(tied to $u_{51}$ ) | 0.8048 | 0.2597  |
| $u_{75}$ | C(29)...H(93)  | 3.8117(225)  | 0.1190(tied to $u_{51}$ ) | 0.1576 | 0.0186  |
| $u_{76}$ | C(53)...H(69)  | 3.8124(226)  | 0.1200(tied to $u_{51}$ ) | 0.1587 | 0.0184  |
| $u_{77}$ | C(45)...H(77)  | 3.8322(270)  | 0.1142(tied to $u_{51}$ ) | 0.1528 | 0.0215  |
| $u_{78}$ | C(37)...H(85)  | 3.8318(268)  | 0.1161(tied to $u_{51}$ ) | 0.1548 | 0.0219  |
| $u_{79}$ | C(21)...H(101) | 3.8555(57)   | 0.0630(tied to $u_{51}$ ) | 0.1016 | 0.0248  |
| $u_{80}$ | Si(1)...H(78)  | 4.3248(700)  | 0.8119(fixed)             | 0.8119 | -0.2595 |
| $u_{81}$ | C(21)...H(78)  | 4.4916(834)  | 0.8428(578)               | 1.2012 | -0.3223 |
| $u_{82}$ | O(9)...C(37)   | 3.9320(193)  | 0.2429(79)                | 0.2788 | 0.1467  |
| $u_{83}$ | O(13)...C(29)  | 3.9683(169)  | 0.1786(tied to $u_{82}$ ) | 0.2146 | 0.1515  |
| $u_{84}$ | Si(1)...C(45)  | 4.1223(142)  | 0.1096(25)                | 0.1082 | 0.0092  |
| $u_{85}$ | Si(1)...C(53)  | 4.1350(141)  | 0.1037(tied to $u_{84}$ ) | 0.1023 | 0.0119  |



|           |                |              |                            |        |         |
|-----------|----------------|--------------|----------------------------|--------|---------|
| $u_{86}$  | Si(1)...H(74)  | 4.1860(723)  | 0.9379(tied to $u_{84}$ )  | 0.9365 | -0.0807 |
| $u_{87}$  | C(29)...H(74)  | 3.3891(1882) | 1.8457(tied to $u_{81}$ )  | 2.2041 | 0.6714  |
| $u_{88}$  | H(69)...H(101) | 4.2341(170)  | -0.1818(tied to $u_{81}$ ) | 0.1766 | 0.0062  |
| $u_{89}$  | H(77)...H(101) | 4.2684(147)  | -0.1786(tied to $u_{81}$ ) | 0.1798 | 0.0058  |
| $u_{90}$  | H(69)...H(77)  | 4.1942(42)   | -0.2079(tied to $u_{81}$ ) | 0.1505 | 0.0701  |
| $u_{91}$  | O(9)...H(77)   | 4.1265(230)  | 0.1304(tied to $u_{81}$ )  | 0.4888 | 0.2554  |
| $u_{92}$  | C(21)...H(74)  | 4.2793(1078) | 1.0352(tied to $u_{81}$ )  | 1.3936 | 0.0076  |
| $u_{93}$  | C(37)...H(78)  | 4.7439(645)  | 1.1305(tied to $u_{81}$ )  | 1.4889 | -0.2662 |
| $u_{94}$  | Si(1)...Si(5)  | 4.3851(11)   | 0.1244(tied to $u_{84}$ )  | 0.123  | 0.0564  |
| $u_{95}$  | O(13)...H(69)  | 4.1616(174)  | 0.0110(tied to $u_{81}$ )  | 0.3694 | 0.2617  |
| $u_{96}$  | Si(1)...Si(3)  | 4.4142(11)   | 0.1264(tied to $u_{84}$ )  | 0.125  | 0.0572  |
| $u_{97}$  | Si(1)...C(22)  | 4.4483(299)  | 0.1503(tied to $u_{84}$ )  | 0.1489 | 0.0526  |
| $u_{98}$  | Si(1)...C(26)  | 4.4371(154)  | 0.1531(tied to $u_{84}$ )  | 0.1517 | 0.0511  |
| $u_{99}$  | Si(1)...Si(7)  | 4.4381(11)   | 0.1238(tied to $u_{84}$ )  | 0.1224 | 0.0575  |
| $u_{100}$ | Si(1)...C(28)  | 4.4482(150)  | 0.1552(tied to $u_{84}$ )  | 0.1537 | 0.0545  |
| $u_{101}$ | C(29)...H(78)  | 4.4085(1799) | 1.3674(tied to $u_{81}$ )  | 1.7258 | 0.2331  |
| $u_{102}$ | O(13)...C(53)  | 4.7123(350)  | 0.2899(tied to $u_{82}$ )  | 0.3258 | -0.1029 |
| $u_{103}$ | H(77)...H(78)  | 4.3741(898)  | 1.5549(tied to $u_{81}$ )  | 1.9133 | 0.2227  |
| $u_{104}$ | O(13)...O(16)  | 4.5136(268)  | 0.2316(tied to $u_{82}$ )  | 0.2676 | 0.0794  |
| $u_{105}$ | O(9)...C(45)   | 4.6306(491)  | 0.3364(tied to $u_{82}$ )  | 0.3724 | -0.0619 |
| $u_{106}$ | O(9)...O(15)   | 4.5547(100)  | 0.2323(tied to $u_{82}$ )  | 0.2682 | 0.0775  |
| $u_{107}$ | O(9)...O(19)   | 4.5697(126)  | 0.2348(tied to $u_{82}$ )  | 0.2708 | 0.0779  |
| $u_{108}$ | O(13)...O(18)  | 4.5442(218)  | 0.2325(tied to $u_{82}$ )  | 0.2684 | 0.0795  |
| $u_{109}$ | Si(1)...C(38)  | 4.8337(496)  | 0.4450(tied to $u_{84}$ )  | 0.4435 | -0.1265 |
| $u_{110}$ | Si(1)...C(61)  | 4.6362(45)   | 0.0890(tied to $u_{84}$ )  | 0.0876 | 0.0282  |
| $u_{111}$ | H(69)...H(78)  | 3.8147(2094) | 1.9380(tied to $u_{81}$ )  | 2.2964 | 1.0638  |
| $u_{112}$ | Si(1)...C(34)  | 4.7620(535)  | 0.5114(tied to $u_{84}$ )  | 0.5099 | -0.0543 |
| $u_{113}$ | C(29)...C(34)  | 4.6732(1668) | 1.4779(31)                 | 1.5133 | 0.0473  |
| $u_{114}$ | O(13)...H(78)  | 5.1732(485)  | 0.6584(tied to $u_{113}$ ) | 0.6937 | -0.2885 |
| $u_{115}$ | O(13)...H(74)  | 5.0569(596)  | 0.6684(tied to $u_{113}$ ) | 0.7037 | -0.2640 |
| $u_{116}$ | O(13)...C(52)  | 4.8088(500)  | 0.3758(tied to $u_{113}$ ) | 0.4111 | 0.0433  |
| $u_{117}$ | H(69)...H(93)  | 4.8691(228)  | 0.1627(tied to $u_{113}$ ) | 0.198  | 0.0343  |
| $u_{118}$ | H(77)...H(85)  | 4.8887(269)  | 0.1608(tied to $u_{113}$ ) | 0.1962 | 0.0377  |
| $u_{119}$ | Si(1)...H(76)  | 4.6737(541)  | 1.0174(tied to $u_{113}$ ) | 1.0527 | 0.2897  |
| $u_{120}$ | C(21)...C(38)  | 5.2298(514)  | 0.6676(tied to $u_{113}$ ) | 0.7029 | -0.1801 |
| $u_{121}$ | Si(1)...H(85)  | 4.9445(115)  | 0.1523(tied to $u_{113}$ ) | 0.1877 | 0.0107  |
| $u_{122}$ | O(13)...C(60)  | 4.8863(329)  | 0.3485(tied to $u_{113}$ ) | 0.3838 | 0.0780  |
| $u_{123}$ | Si(1)...H(93)  | 4.9753(112)  | 0.1433(tied to $u_{113}$ ) | 0.1786 | 0.0141  |
| $u_{124}$ | C(45)...H(74)  | 4.5321(2261) | 2.1763(tied to $u_{113}$ ) | 2.2117 | 0.3931  |
| $u_{125}$ | C(21)...C(34)  | 5.1294(923)  | 0.7768(tied to $u_{113}$ ) | 0.8122 | -0.0620 |
| $u_{126}$ | O(13)...H(93)  | 5.3590(411)  | 0.4494(tied to $u_{113}$ ) | 0.4848 | -0.1613 |
| $u_{127}$ | Si(1)...O(16)  | 5.0553(122)  | 0.1767(tied to $u_{113}$ ) | 0.2121 | 0.0765  |
| $u_{128}$ | C(53)...H(78)  | 5.5468(1190) | 1.4897(tied to $u_{113}$ ) | 1.5251 | -0.3760 |
| $u_{129}$ | Si(1)...C(36)  | 5.0181(361)  | 0.5518(tied to $u_{113}$ ) | 0.5871 | 0.1230  |

|           |                |              |                            |        |         |
|-----------|----------------|--------------|----------------------------|--------|---------|
| $u_{130}$ | Si(1)...O(11)  | 5.1026(210)  | 0.1761(tied to $u_{113}$ ) | 0.2115 | 0.0750  |
| $u_{131}$ | Si(1)...O(19)  | 5.0807(102)  | 0.1776(tied to $u_{113}$ ) | 0.2129 | 0.0767  |
| $u_{132}$ | O(9)...H(78)   | 5.3191(768)  | 0.8551(tied to $u_{113}$ ) | 0.8905 | -0.0191 |
| $u_{133}$ | O(9)...C(53)   | 5.0838(396)  | 0.2086(tied to $u_{113}$ ) | 0.244  | 0.1256  |
| $u_{134}$ | C(45)...H(78)  | 5.2857(2212) | 1.7023(tied to $u_{113}$ ) | 1.7376 | 0.0347  |
| $u_{135}$ | O(9)...H(85)   | 5.2465(617)  | 0.5150(tied to $u_{113}$ ) | 0.5504 | -0.0971 |
| $u_{136}$ | O(13)...C(45)  | 5.1497(226)  | 0.1598(tied to $u_{113}$ ) | 0.1952 | 0.1263  |
| $u_{137}$ | O(9)...C(22)   | 5.2328(229)  | 0.2039(tied to $u_{113}$ ) | 0.2392 | 0.0707  |
| $u_{138}$ | O(9)...H(75)   | 5.2463(483)  | 0.8712(tied to $u_{113}$ ) | 0.9065 | 0.0205  |
| $u_{139}$ | O(13)...C(25)  | 5.2092(123)  | 0.2104(tied to $u_{113}$ ) | 0.2457 | 0.0724  |
| $u_{140}$ | C(21)...C(26)  | 5.2122(440)  | 0.2854(tied to $u_{113}$ ) | 0.3207 | 0.0725  |
| $u_{141}$ | Si(1)...H(84)  | 4.9779(605)  | 0.9072(tied to $u_{113}$ ) | 0.9426 | 0.3153  |
| $u_{142}$ | O(13)...C(22)  | 5.2432(226)  | 0.2006(tied to $u_{113}$ ) | 0.236  | 0.0726  |
| $u_{143}$ | C(21)...C(22)  | 5.2384(211)  | 0.2842(tied to $u_{113}$ ) | 0.3196 | 0.0790  |
| $u_{144}$ | H(69)...H(90)  | 4.3993(2643) | 2.6666(tied to $u_{113}$ ) | 2.702  | 0.7715  |
| $u_{145}$ | O(13)...C(23)  | 5.2453(57)   | 0.2111(tied to $u_{113}$ ) | 0.2465 | 0.0754  |
| $u_{146}$ | Si(1)...C(44)  | 5.1629(340)  | 0.5042(tied to $u_{113}$ ) | 0.5396 | 0.1603  |
| $u_{147}$ | O(13)...O(19)  | 5.2341(232)  | 0.2434(tied to $u_{113}$ ) | 0.2787 | 0.0887  |
| $u_{148}$ | O(13)...C(26)  | 5.2519(227)  | 0.1953(tied to $u_{113}$ ) | 0.2307 | 0.0722  |
| $u_{149}$ | C(29)...C(38)  | 5.3021(1275) | 1.2670(tied to $u_{113}$ ) | 1.3023 | 0.1285  |
| $u_{150}$ | O(9)...C(27)   | 5.2777(227)  | 0.2013(tied to $u_{113}$ ) | 0.2367 | 0.0737  |
| $u_{151}$ | O(9)...O(11)   | 5.3053(442)  | 0.2421(tied to $u_{113}$ ) | 0.2774 | 0.0854  |
| $u_{152}$ | C(37)...H(74)  | 5.2959(1017) | 1.1599(tied to $u_{113}$ ) | 1.1953 | 0.0141  |
| $u_{153}$ | C(37)...H(76)  | 4.7731(1567) | 1.9174(tied to $u_{113}$ ) | 1.9527 | 0.7274  |
| $u_{154}$ | O(13)...C(61)  | 5.4558(265)  | 0.1625(tied to $u_{113}$ ) | 0.1978 | 0.0273  |
| $u_{155}$ | O(13)...C(68)  | 5.3789(413)  | 0.1915(tied to $u_{113}$ ) | 0.2268 | 0.0454  |
| $u_{156}$ | O(9)...C(61)   | 5.3773(474)  | 0.1759(tied to $u_{113}$ ) | 0.2112 | 0.0411  |
| $u_{157}$ | Si(1)...Si(4)  | 5.4037(14)   | 0.0793(tied to $u_{113}$ ) | 0.1147 | 0.0701  |
| $u_{158}$ | C(37)...C(38)  | 5.5067(560)  | 1.0865(tied to $u_{113}$ ) | 1.1219 | -0.0152 |
| $u_{159}$ | O(13)...H(73)  | 5.2584(691)  | 0.9399(tied to $u_{113}$ ) | 0.9753 | 0.1468  |
| $u_{160}$ | C(61)...H(78)  | 5.9530(1872) | 1.4225(tied to $u_{113}$ ) | 1.4579 | -0.3900 |
| $u_{161}$ | O(13)...C(38)  | 5.6625(401)  | 0.3791(tied to $u_{113}$ ) | 0.4145 | -0.1099 |
| $u_{162}$ | O(13)...H(79)  | 5.4275(497)  | 0.9041(tied to $u_{113}$ ) | 0.9395 | 0.1169  |
| $u_{163}$ | O(13)...C(34)  | 5.5877(460)  | 0.3838(tied to $u_{113}$ ) | 0.4192 | -0.0872 |
| $u_{164}$ | C(21)...H(76)  | 5.0496(1018) | 1.5137(tied to $u_{113}$ ) | 1.5491 | 0.5649  |
| $u_{165}$ | C(37)...H(84)  | 5.2052(833)  | 1.6354(tied to $u_{113}$ ) | 1.6707 | 0.4017  |
| $u_{166}$ | O(13)...H(92)  | 5.5121(574)  | 0.5718(tied to $u_{113}$ ) | 0.6072 | 0.0726  |
| $u_{167}$ | Si(1)...C(42)  | 5.4843(196)  | 0.3059(tied to $u_{113}$ ) | 0.3413 | 0.2232  |
| $u_{168}$ | O(9)...C(38)   | 5.7703(473)  | 0.4736(tied to $u_{113}$ ) | 0.5089 | -0.0071 |
| $u_{169}$ | C(29)...C(50)  | 5.6161(2149) | 1.5142(tied to $u_{113}$ ) | 1.5495 | -0.0085 |
| $u_{170}$ | C(21)...C(36)  | 5.5214(835)  | 0.8771(tied to $u_{113}$ ) | 0.9124 | 0.2200  |
| $u_{171}$ | Si(1)...H(101) | 5.6919(46)   | 0.0790(tied to $u_{113}$ ) | 0.1143 | 0.0452  |
| $u_{172}$ | H(77)...H(100) | 5.9661(1222) | 1.7474(tied to $u_{113}$ ) | 1.7827 | -0.2299 |
| $u_{173}$ | Si(1)...C(30)  | 5.5104(158)  | 0.2380(tied to $u_{113}$ ) | 0.2734 | 0.2433  |

|           |                |              |                            |        |         |
|-----------|----------------|--------------|----------------------------|--------|---------|
| $u_{174}$ | O(9)...C(35)   | 5.7200(314)  | 0.4873(tied to $u_{113}$ ) | 0.5226 | 0.0216  |
| $u_{175}$ | O(13)...H(100) | 5.6442(412)  | 0.5301(tied to $u_{113}$ ) | 0.5655 | 0.1245  |
| $u_{176}$ | Si(1)...H(75)  | 5.9561(489)  | 0.6867(247)                | 0.6485 | -0.1646 |
| $u_{177}$ | O(13)...C(33)  | 5.7269(466)  | 0.2274(263)                | 0.5577 | 0.0747  |
| $u_{178}$ | C(29)...H(90)  | 5.5638(2583) | 2.0676(tied to $u_{176}$ ) | 2.0295 | 0.1545  |
| $u_{179}$ | H(69)...H(75)  | 6.4010(1165) | 1.2652(tied to $u_{176}$ ) | 1.2271 | -0.5867 |
| $u_{180}$ | H(69)...H(82)  | 5.5735(699)  | 1.2807(tied to $u_{176}$ ) | 1.2425 | 0.2449  |
| $u_{181}$ | H(77)...H(92)  | 5.5771(2614) | 2.1494(tied to $u_{176}$ ) | 2.1112 | 0.3894  |
| $u_{182}$ | O(13)...C(39)  | 5.8146(284)  | 0.2214(tied to $u_{177}$ ) | 0.5517 | 0.0640  |
| $u_{183}$ | Si(1)...H(82)  | 5.5981(287)  | 0.6314(tied to $u_{176}$ ) | 0.5933 | 0.3513  |
| $u_{184}$ | C(61)...H(74)  | 5.8635(2063) | 1.7382(tied to $u_{176}$ ) | 1.7001 | -0.0254 |
| $u_{185}$ | Si(1)...H(79)  | 6.0804(403)  | 0.7462(tied to $u_{176}$ ) | 0.7081 | -0.1120 |
| $u_{186}$ | Si(1)...C(54)  | 6.1196(482)  | 0.4757(tied to $u_{176}$ ) | 0.4376 | -0.0746 |
| $u_{187}$ | C(21)...C(44)  | 5.7178(468)  | 0.8679(tied to $u_{176}$ ) | 0.8298 | 0.2709  |
| $u_{188}$ | Si(1)...C(25)  | 5.9693(111)  | 0.2155(tied to $u_{176}$ ) | 0.1774 | 0.0752  |
| $u_{189}$ | Si(1)...H(70)  | 5.6235(190)  | 0.5007(tied to $u_{176}$ ) | 0.4626 | 0.3830  |
| $u_{190}$ | C(53)...H(74)  | 6.0253(1577) | 1.3825(tied to $u_{176}$ ) | 1.3444 | -0.0269 |
| $u_{191}$ | Si(1)...C(50)  | 6.0345(681)  | 0.5208(tied to $u_{176}$ ) | 0.4826 | -0.0175 |
| $u_{192}$ | C(21)...H(84)  | 5.4946(689)  | 1.4044(tied to $u_{176}$ ) | 1.3663 | 0.5624  |
| $u_{193}$ | Si(1)...C(23)  | 6.0110(110)  | 0.2150(tied to $u_{176}$ ) | 0.1769 | 0.0782  |
| $u_{194}$ | C(37)...C(52)  | 6.1150(1691) | 1.3581(tied to $u_{176}$ ) | 1.32   | 0.0478  |
| $u_{195}$ | C(21)...C(54)  | 6.3170(550)  | 0.7830(tied to $u_{176}$ ) | 0.7448 | -0.1207 |
| $u_{196}$ | Si(1)...C(27)  | 6.0357(219)  | 0.2078(tied to $u_{176}$ ) | 0.1697 | 0.0771  |
| $u_{197}$ | O(9)...H(93)   | 5.9577(351)  | 0.3868(tied to $u_{176}$ ) | 0.3487 | 0.1879  |
| $u_{198}$ | O(13)...H(81)  | 5.9591(524)  | 0.8966(tied to $u_{176}$ ) | 0.8585 | 0.3044  |
| $u_{199}$ | C(37)...C(60)  | 6.2805(1030) | 1.1929(tied to $u_{176}$ ) | 1.1548 | -0.0688 |
| $u_{200}$ | O(13)...H(85)  | 6.0209(164)  | 0.3033(tied to $u_{176}$ ) | 0.2652 | 0.1903  |
| $u_{201}$ | C(21)...H(94)  | 6.5884(766)  | 1.0941(tied to $u_{176}$ ) | 1.0559 | -0.2464 |
| $u_{202}$ | C(21)...C(50)  | 6.1822(1260) | 0.8627(tied to $u_{176}$ ) | 0.8245 | -0.0248 |
| $u_{203}$ | O(13)...C(41)  | 6.0855(275)  | 0.5518(tied to $u_{176}$ ) | 0.5137 | 0.1828  |
| $u_{204}$ | C(29)...C(42)  | 6.0408(954)  | 0.8412(tied to $u_{176}$ ) | 0.8031 | 0.1631  |
| $u_{205}$ | O(13)...H(71)  | 5.8822(444)  | 0.8915(tied to $u_{176}$ ) | 0.8534 | 0.3415  |
| $u_{206}$ | O(13)...C(31)  | 6.0443(334)  | 0.5513(tied to $u_{176}$ ) | 0.5132 | 0.2029  |
| $u_{207}$ | H(77)...H(108) | 6.7616(2103) | 1.4476(4119)               | 1.491  | -0.4131 |
| $u_{208}$ | C(29)...C(54)  | 6.2810(1227) | 1.3934(1785)               | 1.3974 | 0.1567  |
| $u_{209}$ | C(45)...H(90)  | 5.9591(3547) | 2.1997(tied to $u_{207}$ ) | 2.2431 | 0.2160  |
| $u_{210}$ | O(9)...C(30)   | 6.1284(202)  | 0.6441(2271)               | 0.4753 | 0.2260  |
| $u_{211}$ | C(53)...H(76)  | 5.8090(1549) | 2.0270(tied to $u_{207}$ ) | 2.0703 | 0.7088  |
| $u_{212}$ | C(29)...H(94)  | 6.4016(1568) | 1.6713(tied to $u_{207}$ ) | 1.7146 | 0.1358  |
| $u_{213}$ | Si(1)...C(52)  | 6.2285(586)  | 0.4899(71)                 | 0.5336 | 0.1188  |
| $u_{214}$ | C(45)...C(50)  | 6.2520(2926) | 1.6737(tied to $u_{208}$ ) | 1.6776 | 0.0130  |
| $u_{215}$ | Si(1)...H(94)  | 6.6381(618)  | 0.6053(tied to $u_{207}$ ) | 0.6486 | -0.1588 |
| $u_{216}$ | O(9)...C(43)   | 6.1993(296)  | 0.6057(tied to $u_{210}$ ) | 0.4369 | 0.2164  |
| $u_{217}$ | C(21)...H(90)  | 6.3839(1578) | 1.1401(tied to $u_{207}$ ) | 1.1834 | -0.0614 |

|           |                |              |                            |        |         |
|-----------|----------------|--------------|----------------------------|--------|---------|
| $u_{218}$ | O(9)...H(70)   | 6.0235(392)  | 0.7338(tied to $u_{207}$ ) | 0.7772 | 0.3716  |
| $u_{219}$ | Si(1)...H(81)  | 6.3834(662)  | 0.7992(tied to $u_{207}$ ) | 0.8425 | 0.1386  |
| $u_{220}$ | C(37)...H(94)  | 6.6126(805)  | 1.4489(tied to $u_{207}$ ) | 1.4922 | -0.1122 |
| $u_{221}$ | Si(1)...C(35)  | 6.4557(353)  | 0.3368(tied to $u_{213}$ ) | 0.3805 | -0.0355 |
| $u_{222}$ | Si(1)...C(39)  | 6.5311(303)  | 0.3665(tied to $u_{213}$ ) | 0.4102 | -0.0247 |
| $u_{223}$ | O(13)...H(101) | 6.4795(274)  | 0.1884(tied to $u_{207}$ ) | 0.2317 | 0.0453  |
| $u_{224}$ | O(13)...H(108) | 6.3898(495)  | 0.2200(tied to $u_{207}$ ) | 0.2633 | 0.0655  |
| $u_{225}$ | O(9)...H(101)  | 6.3931(511)  | 0.2022(tied to $u_{207}$ ) | 0.2456 | 0.0596  |
| $u_{226}$ | O(9)...H(83)   | 6.1776(468)  | 0.6530(tied to $u_{207}$ ) | 0.6964 | 0.3287  |
| $u_{227}$ | H(77)...H(79)  | 6.4433(1271) | 1.8141(tied to $u_{207}$ ) | 1.8574 | 0.0575  |
| $u_{228}$ | C(37)...C(54)  | 6.4669(651)  | 1.2263(tied to $u_{208}$ ) | 1.2303 | 0.0672  |
| $u_{229}$ | C(37)...C(68)  | 6.6867(1516) | 1.0003(tied to $u_{208}$ ) | 1.0042 | -0.1609 |
| $u_{230}$ | Si(1)...C(60)  | 6.3382(425)  | 0.4500(tied to $u_{213}$ ) | 0.4936 | 0.1540  |
| $u_{231}$ | Si(1)...H(90)  | 6.5085(908)  | 0.6743(tied to $u_{207}$ ) | 0.7176 | -0.0616 |
| $u_{232}$ | C(21)...C(42)  | 6.2102(507)  | 0.5373(tied to $u_{208}$ ) | 0.5413 | 0.3320  |
| $u_{233}$ | H(69)...H(94)  | 5.9629(1895) | 2.2929(tied to $u_{207}$ ) | 2.3362 | 0.7809  |
| $u_{234}$ | O(13)...C(30)  | 6.2933(209)  | 0.4811(tied to $u_{210}$ ) | 0.3123 | 0.2603  |
| $u_{235}$ | O(13)...C(42)  | 6.3420(182)  | 0.4507(tied to $u_{210}$ ) | 0.2819 | 0.2475  |
| $u_{236}$ | C(37)...H(92)  | 6.3923(2064) | 1.7265(tied to $u_{207}$ ) | 1.7698 | 0.3225  |
| $u_{237}$ | C(21)...C(30)  | 6.2946(138)  | 0.4644(tied to $u_{208}$ ) | 0.4683 | 0.3555  |
| $u_{238}$ | H(77)...H(94)  | 6.3532(961)  | 1.9634(tied to $u_{207}$ ) | 2.0067 | 0.3268  |
| $u_{239}$ | C(29)...H(75)  | 7.0794(1001) | 0.9421(tied to $u_{207}$ ) | 0.9855 | -0.4594 |
| $u_{240}$ | C(53)...H(84)  | 6.2080(876)  | 1.7598(tied to $u_{207}$ ) | 1.8031 | 0.4785  |
| $u_{241}$ | Si(1)...H(73)  | 6.3780(558)  | 0.7962(tied to $u_{207}$ ) | 0.8395 | 0.2497  |
| $u_{242}$ | C(29)...H(76)  | 6.0298(567)  | 1.5952(tied to $u_{207}$ ) | 1.6385 | 0.6978  |
| $u_{243}$ | C(21)...C(52)  | 6.4971(1247) | 0.8889(tied to $u_{208}$ ) | 0.8929 | 0.2058  |
| $u_{244}$ | C(45)...H(94)  | 6.7693(2088) | 1.8434(tied to $u_{207}$ ) | 1.8867 | 0.1065  |
| $u_{245}$ | C(29)...C(66)  | 6.6832(2004) | 1.1173(tied to $u_{208}$ ) | 1.1212 | -0.0317 |
| $u_{246}$ | H(69)...H(106) | 6.7184(2240) | 1.7120(tied to $u_{207}$ ) | 1.7553 | -0.0671 |
| $u_{247}$ | Si(1)...C(41)  | 6.6963(369)  | 0.4343(tied to $u_{213}$ ) | 0.478  | 0.0918  |
| $u_{248}$ | C(29)...H(82)  | 6.3108(664)  | 0.9868(tied to $u_{207}$ ) | 1.0301 | 0.4245  |
| $u_{249}$ | O(13)...H(70)  | 6.3569(192)  | 0.3969(tied to $u_{207}$ ) | 0.4403 | 0.3882  |
| $u_{250}$ | C(53)...H(94)  | 6.9828(1419) | 1.6267(tied to $u_{207}$ ) | 1.67   | -0.1475 |
| $u_{251}$ | O(13)...H(82)  | 6.4637(195)  | 0.3575(tied to $u_{207}$ ) | 0.4008 | 0.3500  |
| $u_{252}$ | Si(1)...C(58)  | 6.6138(444)  | 0.2807(tied to $u_{213}$ ) | 0.3244 | 0.2145  |
| $u_{253}$ | C(37)...H(100) | 6.6757(1179) | 1.4966(tied to $u_{207}$ ) | 1.5399 | 0.1269  |
| $u_{254}$ | O(13)...C(54)  | 6.9537(487)  | 0.5979(tied to $u_{210}$ ) | 0.4291 | -0.0521 |
| $u_{255}$ | C(21)...H(75)  | 7.0623(883)  | 0.7696(tied to $u_{207}$ ) | 0.8129 | -0.2459 |
| $u_{256}$ | Si(1)...C(33)  | 6.6903(332)  | 0.4349(tied to $u_{213}$ ) | 0.4785 | 0.1535  |
| $u_{257}$ | C(45)...C(54)  | 6.8514(1683) | 1.4875(tied to $u_{208}$ ) | 1.4914 | 0.1248  |
| $u_{258}$ | Si(1)...C(46)  | 6.6733(234)  | 0.2240(tied to $u_{213}$ ) | 0.2677 | 0.2268  |
| $u_{259}$ | O(13)...C(50)  | 6.8604(528)  | 0.5984(tied to $u_{210}$ ) | 0.4296 | -0.0265 |
| $u_{260}$ | C(61)...H(94)  | 7.2551(1969) | 1.5525(tied to $u_{207}$ ) | 1.5958 | -0.2344 |
| $u_{261}$ | O(13)...C(24)  | 6.8276(139)  | 0.1864(187)                | 0.2247 | 0.0952  |

|           |                |              |                            |        |         |
|-----------|----------------|--------------|----------------------------|--------|---------|
| $u_{262}$ | H(69)...H(98)  | 6.8309(1518) | 1.2969(tied to $u_{207}$ ) | 1.3403 | 0.0715  |
| $u_{263}$ | C(29)...C(58)  | 6.7754(1534) | 0.9053(tied to $u_{208}$ ) | 0.9092 | 0.1306  |
| $u_{264}$ | O(9)...C(23)   | 6.8801(187)  | 0.1854(tied to $u_{261}$ ) | 0.2237 | 0.0948  |
| $u_{265}$ | C(21)...C(60)  | 6.6548(837)  | 0.8175(tied to $u_{208}$ ) | 0.8214 | 0.2579  |
| $u_{266}$ | O(13)...C(27)  | 6.8597(113)  | 0.1852(tied to $u_{261}$ ) | 0.2235 | 0.0956  |
| $u_{267}$ | C(21)...H(82)  | 6.4632(398)  | 0.7831(tied to $u_{207}$ ) | 0.8264 | 0.5286  |
| $u_{268}$ | Si(1)...C(68)  | 6.8300(541)  | 0.2737(tied to $u_{213}$ ) | 0.3174 | 0.1169  |
| $u_{269}$ | Si(1)...C(62)  | 6.9399(344)  | 0.2389(tied to $u_{213}$ ) | 0.2826 | 0.0923  |
| $u_{270}$ | C(29)...C(30)  | 6.5122(420)  | 1.0185(tied to $u_{208}$ ) | 1.0225 | 0.4605  |
| $u_{271}$ | Si(1)...C(66)  | 6.8615(609)  | 0.2503(tied to $u_{213}$ ) | 0.294  | 0.1073  |
| $u_{272}$ | C(21)...H(79)  | 7.1826(503)  | 0.8702(tied to $u_{207}$ ) | 0.9135 | -0.1476 |
| $u_{273}$ | O(9)...C(54)   | 7.0561(453)  | 0.4539(tied to $u_{261}$ ) | 0.4922 | 0.0216  |
| $u_{274}$ | Si(1)...H(92)  | 6.8252(704)  | 0.7551(tied to $u_{207}$ ) | 0.7984 | 0.1689  |
| $u_{275}$ | C(53)...C(54)  | 7.0208(1177) | 1.3263(tied to $u_{208}$ ) | 1.3303 | 0.0402  |
| $u_{276}$ | O(13)...H(75)  | 7.0323(447)  | 0.4702(tied to $u_{207}$ ) | 0.5135 | -0.0299 |
| $u_{277}$ | O(9)...C(51)   | 6.9672(411)  | 0.4622(tied to $u_{261}$ ) | 0.5005 | 0.0549  |
| $u_{278}$ | C(37)...H(79)  | 7.2466(904)  | 1.3427(tied to $u_{207}$ ) | 1.3861 | -0.1518 |
| $u_{279}$ | O(9)...H(79)   | 7.1909(374)  | 0.4837(tied to $u_{207}$ ) | 0.5271 | -0.0340 |
| $u_{280}$ | O(13)...C(49)  | 7.0074(634)  | 0.4888(tied to $u_{261}$ ) | 0.5271 | 0.0889  |
| $u_{281}$ | O(13)...C(55)  | 7.0596(460)  | 0.4837(tied to $u_{261}$ ) | 0.522  | 0.0838  |
| $u_{282}$ | H(69)...H(70)  | 6.3089(343)  | 1.6299(tied to $u_{207}$ ) | 1.6733 | 0.8037  |
| $u_{283}$ | C(21)...H(70)  | 6.5715(263)  | 0.6120(tied to $u_{207}$ ) | 0.6554 | 0.5561  |
| $u_{284}$ | Si(1)...C(31)  | 6.9509(245)  | 0.3063(tied to $u_{213}$ ) | 0.3499 | 0.2296  |
| $u_{285}$ | C(53)...C(68)  | 7.3555(1615) | 1.1704(tied to $u_{208}$ ) | 1.1744 | -0.0809 |
| $u_{286}$ | Si(1)...H(71)  | 6.8764(299)  | 0.5240(tied to $u_{207}$ ) | 0.5674 | 0.3420  |
| $u_{287}$ | O(13)...H(94)  | 7.4645(637)  | 0.5626(tied to $u_{207}$ ) | 0.6059 | -0.1453 |
| $u_{288}$ | C(21)...H(92)  | 6.9020(1507) | 1.2601(tied to $u_{207}$ ) | 1.3035 | 0.3419  |
| $u_{289}$ | C(21)...C(68)  | 7.0784(1180) | 0.5959(tied to $u_{208}$ ) | 0.5999 | 0.1626  |
| $u_{290}$ | C(61)...H(90)  | 7.1012(3421) | 1.7135(tied to $u_{207}$ ) | 1.7568 | 0.0405  |
| $u_{291}$ | Si(1)...H(100) | 7.0156(556)  | 0.6960(tied to $u_{207}$ ) | 0.7393 | 0.2230  |
| $u_{292}$ | Si(1)...C(43)  | 7.0603(198)  | 0.2152(tied to $u_{213}$ ) | 0.2589 | 0.2255  |
| $u_{293}$ | C(37)...H(108) | 7.4454(1793) | 1.0435(tied to $u_{207}$ ) | 1.0868 | -0.1455 |
| $u_{294}$ | C(37)...C(50)  | 6.9847(1374) | 0.8922(tied to $u_{208}$ ) | 0.8961 | 0.2556  |
| $u_{295}$ | O(13)...H(90)  | 7.3151(697)  | 0.5594(tied to $u_{207}$ ) | 0.6027 | -0.1106 |
| $u_{296}$ | C(21)...C(66)  | 7.1192(1201) | 0.5692(tied to $u_{208}$ ) | 0.5732 | 0.1427  |
| $u_{297}$ | C(21)...C(62)  | 7.2581(389)  | 0.5555(tied to $u_{208}$ ) | 0.5594 | 0.1230  |
| $u_{298}$ | C(53)...H(92)  | 6.9596(2094) | 1.9907(tied to $u_{207}$ ) | 2.034  | 0.4622  |
| $u_{299}$ | Si(1)...C(24)  | 7.2410(22)   | 0.0836(tied to $u_{213}$ ) | 0.1273 | 0.0911  |
| $u_{300}$ | O(13)...H(80)  | 7.3306(507)  | 0.5441(tied to $u_{207}$ ) | 0.5875 | 0.0846  |
| $u_{301}$ | C(37)...H(90)  | 7.0965(1729) | 1.1974(259)                | 1.1702 | 0.1707  |
| $u_{302}$ | Si(1)...H(83)  | 7.0827(282)  | 0.4351(tied to $u_{301}$ ) | 0.4078 | 0.3112  |
| $u_{303}$ | C(61)...H(76)  | 6.8414(1149) | 1.9479(tied to $u_{301}$ ) | 1.9206 | 0.6653  |
| $u_{304}$ | C(29)...C(44)  | 6.7945(471)  | 1.3508(2262)               | 0.9026 | 0.5791  |
| $u_{305}$ | C(45)...C(66)  | 7.2927(2794) | 1.7074(tied to $u_{304}$ ) | 1.2592 | 0.0396  |

|           |                |              |                            |        |         |
|-----------|----------------|--------------|----------------------------|--------|---------|
| $u_{306}$ | C(21)...C(25)  | 7.3554(302)  | 0.7120(tied to $u_{304}$ ) | 0.2638 | 0.0933  |
| $u_{307}$ | C(21)...C(58)  | 7.0993(920)  | 1.0248(tied to $u_{304}$ ) | 0.5766 | 0.3227  |
| $u_{308}$ | O(13)...C(57)  | 7.3006(431)  | 0.4411(87)                 | 0.4799 | 0.1810  |
| $u_{309}$ | C(29)...C(62)  | 7.2785(829)  | 1.6722(tied to $u_{304}$ ) | 1.224  | 0.2884  |
| $u_{310}$ | O(13)...C(47)  | 7.2534(585)  | 0.4474(tied to $u_{308}$ ) | 0.4861 | 0.2019  |
| $u_{311}$ | C(29)...H(84)  | 6.6264(666)  | 1.4291(tied to $u_{301}$ ) | 1.4018 | 0.8240  |
| $u_{312}$ | O(13)...H(72)  | 7.2677(468)  | 0.6118(tied to $u_{301}$ ) | 0.5846 | 0.1671  |
| $u_{313}$ | C(21)...C(23)  | 7.4204(298)  | 0.7090(tied to $u_{304}$ ) | 0.2607 | 0.0996  |
| $u_{314}$ | C(29)...H(70)  | 6.8125(322)  | 1.1665(tied to $u_{301}$ ) | 1.1393 | 0.6495  |
| $u_{315}$ | O(9)...H(94)   | 7.6170(597)  | 0.7520(tied to $u_{301}$ ) | 0.7247 | -0.0034 |
| $u_{316}$ | C(45)...H(76)  | 6.8697(729)  | 1.8265(tied to $u_{301}$ ) | 1.7993 | 0.7218  |
| $u_{317}$ | C(29)...H(106) | 7.4740(2216) | 1.2298(tied to $u_{301}$ ) | 1.2026 | -0.0247 |
| $u_{318}$ | C(29)...C(35)  | 7.7363(904)  | 1.1453(tied to $u_{304}$ ) | 0.697  | -0.2807 |
| $u_{319}$ | C(21)...C(46)  | 7.2317(241)  | 0.9664(tied to $u_{304}$ ) | 0.5181 | 0.3371  |
| $u_{320}$ | O(13)...C(35)  | 7.4559(287)  | 0.2974(tied to $u_{308}$ ) | 0.3361 | 0.0477  |
| $u_{321}$ | O(9)...C(39)   | 7.5595(252)  | 0.3009(tied to $u_{308}$ ) | 0.3397 | 0.0391  |
| $u_{322}$ | O(9)...C(46)   | 7.3580(281)  | 0.4063(tied to $u_{308}$ ) | 0.4451 | 0.2151  |
| $u_{323}$ | C(21)...C(27)  | 7.4477(595)  | 0.6938(tied to $u_{304}$ ) | 0.2455 | 0.0959  |
| $u_{324}$ | O(9)...H(91)   | 7.4732(503)  | 0.7533(tied to $u_{301}$ ) | 0.726  | 0.0385  |
| $u_{325}$ | C(53)...H(100) | 7.2719(1426) | 1.8256(tied to $u_{301}$ ) | 1.7983 | 0.2975  |
| $u_{326}$ | O(9)...C(59)   | 7.3617(330)  | 0.3817(tied to $u_{308}$ ) | 0.4205 | 0.2211  |
| $u_{327}$ | C(21)...C(35)  | 7.6687(758)  | 0.9464(tied to $u_{304}$ ) | 0.4982 | -0.0695 |
| $u_{328}$ | C(21)...H(100) | 7.1838(983)  | 1.2194(tied to $u_{301}$ ) | 1.1922 | 0.4124  |
| $u_{329}$ | C(21)...C(39)  | 7.7525(481)  | 0.9967(tied to $u_{304}$ ) | 0.5485 | -0.0441 |
| $u_{330}$ | O(13)...C(40)  | 7.6201(280)  | 0.3237(tied to $u_{308}$ ) | 0.3625 | 0.0977  |
| $u_{331}$ | C(21)...H(81)  | 7.5828(871)  | 1.1586(tied to $u_{301}$ ) | 1.1314 | 0.2196  |
| $u_{332}$ | O(13)...H(89)  | 7.5452(900)  | 0.8006(tied to $u_{301}$ ) | 0.7734 | 0.1077  |
| $u_{333}$ | O(13)...C(46)  | 7.4848(370)  | 0.2755(tied to $u_{308}$ ) | 0.3143 | 0.2532  |
| $u_{334}$ | O(13)...H(95)  | 7.6405(615)  | 0.7875(tied to $u_{301}$ ) | 0.7603 | 0.0947  |
| $u_{335}$ | C(37)...C(39)  | 7.9292(792)  | 1.3956(tied to $u_{304}$ ) | 0.9474 | -0.1631 |
| $u_{336}$ | H(69)...H(81)  | 7.4115(216)  | 1.9392(tied to $u_{301}$ ) | 1.912  | 0.3614  |
| $u_{337}$ | C(53)...H(90)  | 7.4778(2642) | 1.4250(tied to $u_{301}$ ) | 1.3977 | 0.1584  |
| $u_{338}$ | Si(1)...H(98)  | 7.4571(399)  | 0.4914(tied to $u_{301}$ ) | 0.4642 | 0.3044  |
| $u_{339}$ | C(29)...C(46)  | 7.3355(499)  | 1.5852(tied to $u_{304}$ ) | 1.1369 | 0.4581  |
| $u_{340}$ | O(13)...C(32)  | 7.5851(261)  | 0.3226(tied to $u_{308}$ ) | 0.3614 | 0.1419  |
| $u_{341}$ | O(13)...C(58)  | 7.4884(339)  | 0.2507(tied to $u_{308}$ ) | 0.2894 | 0.2508  |
| $u_{342}$ | C(45)...H(75)  | 8.1398(1059) | 1.0823(tied to $u_{301}$ ) | 1.0551 | -0.4447 |
| $u_{343}$ | C(37)...C(62)  | 7.4769(611)  | 1.5706(tied to $u_{304}$ ) | 1.1224 | 0.3572  |
| $u_{344}$ | O(9)...H(71)   | 7.5445(294)  | 0.4857(tied to $u_{301}$ ) | 0.4584 | 0.2414  |
| $u_{345}$ | Si(1)...H(80)  | 7.7910(358)  | 0.4117(tied to $u_{301}$ ) | 0.3845 | 0.0709  |
| $u_{346}$ | Si(1)...C(51)  | 7.7390(372)  | 0.4184(tied to $u_{301}$ ) | 0.3912 | 0.0170  |
| $u_{347}$ | Si(1)...C(55)  | 7.8229(453)  | 0.4411(tied to $u_{301}$ ) | 0.4138 | 0.0188  |
| $u_{348}$ | C(37)...C(42)  | 7.2422(605)  | 1.1997(tied to $u_{304}$ ) | 0.7514 | 0.6032  |
| $u_{349}$ | Si(1)...H(72)  | 7.6718(386)  | 0.4102(tied to $u_{301}$ ) | 0.383  | 0.1137  |

|                         |                |              |                                          |        |         |
|-------------------------|----------------|--------------|------------------------------------------|--------|---------|
| <i>u</i> <sub>350</sub> | C(45)...C(58)  | 7.5269(2149) | 1.4949(tied to <i>u</i> <sub>304</sub> ) | 1.0467 | 0.2385  |
| <i>u</i> <sub>351</sub> | O(9)...C(62)   | 7.7775(350)  | 0.3028(tied to <i>u</i> <sub>308</sub> ) | 0.3416 | 0.1192  |
| <i>u</i> <sub>352</sub> | Si(1)...H(86)  | 7.5168(172)  | 0.3851(tied to <i>u</i> <sub>301</sub> ) | 0.3579 | 0.3225  |
| <i>u</i> <sub>353</sub> | O(13)...C(65)  | 7.7232(576)  | 0.3136(tied to <i>u</i> <sub>308</sub> ) | 0.3524 | 0.1296  |
| <i>u</i> <sub>354</sub> | O(13)...H(83)  | 7.6694(262)  | 0.4226(tied to <i>u</i> <sub>301</sub> ) | 0.3954 | 0.2161  |
| <i>u</i> <sub>355</sub> | O(13)...C(62)  | 7.7752(439)  | 0.2900(tied to <i>u</i> <sub>308</sub> ) | 0.3288 | 0.1215  |
| <i>u</i> <sub>356</sub> | O(13)...C(63)  | 7.7191(580)  | 0.3186(tied to <i>u</i> <sub>308</sub> ) | 0.3574 | 0.1369  |
| <i>u</i> <sub>357</sub> | C(53)...H(108) | 7.9719(1977) | 1.3308(tied to <i>u</i> <sub>301</sub> ) | 1.3035 | -0.0569 |
| <i>u</i> <sub>358</sub> | C(29)...H(98)  | 7.5530(1502) | 1.0641(tied to <i>u</i> <sub>301</sub> ) | 1.0368 | 0.2992  |
| <i>u</i> <sub>359</sub> | O(9)...C(67)   | 7.7130(372)  | 0.3040(tied to <i>u</i> <sub>308</sub> ) | 0.3427 | 0.1427  |
| <i>u</i> <sub>360</sub> | C(45)...H(82)  | 7.3158(979)  | 1.1681(tied to <i>u</i> <sub>301</sub> ) | 1.1408 | 0.5356  |
| <i>u</i> <sub>361</sub> | O(13)...C(66)  | 7.7158(449)  | 0.2840(tied to <i>u</i> <sub>308</sub> ) | 0.3228 | 0.1372  |
| <i>u</i> <sub>362</sub> | H(69)...H(91)  | 8.3558(1186) | 1.2603(tied to <i>u</i> <sub>301</sub> ) | 1.2331 | -0.5522 |
| <i>u</i> <sub>363</sub> | O(9)...C(31)   | 7.7486(243)  | 0.2662(tied to <i>u</i> <sub>308</sub> ) | 0.305  | 0.1881  |
| <i>u</i> <sub>364</sub> | C(29)...C(52)  | 7.4141(874)  | 1.5003(tied to <i>u</i> <sub>304</sub> ) | 1.0521 | 0.5060  |
| <i>u</i> <sub>365</sub> | C(61)...H(84)  | 7.2825(834)  | 1.7418(tied to <i>u</i> <sub>301</sub> ) | 1.7146 | 0.6980  |
| <i>u</i> <sub>366</sub> | O(13)...C(43)  | 7.8008(125)  | 0.2317(tied to <i>u</i> <sub>308</sub> ) | 0.2704 | 0.1801  |
| <i>u</i> <sub>367</sub> | Si(1)...H(108) | 7.8016(675)  | 0.3996(tied to <i>u</i> <sub>301</sub> ) | 0.3723 | 0.1434  |
| <i>u</i> <sub>368</sub> | Si(1)...H(102) | 7.9334(368)  | 0.3590(tied to <i>u</i> <sub>301</sub> ) | 0.3318 | 0.1145  |
| <i>u</i> <sub>369</sub> | H(77)...H(90)  | 7.4471(1264) | 1.3535(tied to <i>u</i> <sub>301</sub> ) | 1.3263 | 0.4640  |
| <i>u</i> <sub>370</sub> | C(37)...H(70)  | 7.1852(464)  | 0.9445(tied to <i>u</i> <sub>301</sub> ) | 0.9173 | 0.7681  |
| <i>u</i> <sub>371</sub> | Si(1)...H(106) | 7.8429(684)  | 0.3715(tied to <i>u</i> <sub>301</sub> ) | 0.3443 | 0.1310  |
| <i>u</i> <sub>372</sub> | C(21)...C(41)  | 7.9677(543)  | 1.1139(tied to <i>u</i> <sub>304</sub> ) | 0.6656 | 0.1251  |
| <i>u</i> <sub>373</sub> | Si(1)...C(57)  | 7.9758(401)  | 0.4821(tied to <i>u</i> <sub>301</sub> ) | 0.4549 | 0.1088  |
| <i>u</i> <sub>374</sub> | H(69)...H(84)  | 7.0542(593)  | 1.3393(tied to <i>u</i> <sub>301</sub> ) | 1.3121 | 0.9508  |
| <i>u</i> <sub>375</sub> | C(29)...H(79)  | 8.0855(717)  | 0.9705(tied to <i>u</i> <sub>301</sub> ) | 0.9433 | 0.0206  |
| <i>u</i> <sub>376</sub> | C(21)...H(73)  | 7.6396(532)  | 1.1442(tied to <i>u</i> <sub>301</sub> ) | 1.117  | 0.3539  |
| <i>u</i> <sub>377</sub> | C(45)...C(62)  | 7.8502(1242) | 1.7686(tied to <i>u</i> <sub>304</sub> ) | 1.3204 | 0.3157  |
| <i>u</i> <sub>378</sub> | C(45)...H(106) | 7.9390(3139) | 1.4130(tied to <i>u</i> <sub>301</sub> ) | 1.3858 | 0.0593  |
| <i>u</i> <sub>379</sub> | Si(1)...C(40)  | 8.0621(195)  | 0.2491(tied to <i>u</i> <sub>301</sub> ) | 0.2219 | 0.0980  |
| <i>u</i> <sub>380</sub> | C(37)...H(75)  | 8.1027(922)  | 0.9505(tied to <i>u</i> <sub>301</sub> ) | 0.9233 | -0.0352 |
| <i>u</i> <sub>381</sub> | C(29)...H(81)  | 7.9464(475)  | 1.5698(tied to <i>u</i> <sub>301</sub> ) | 1.5426 | 0.2611  |
| <i>u</i> <sub>382</sub> | Si(1)...C(32)  | 7.9965(204)  | 0.2492(tied to <i>u</i> <sub>301</sub> ) | 0.2219 | 0.1211  |
| <i>u</i> <sub>383</sub> | Si(1)...C(49)  | 7.9745(453)  | 0.4786(tied to <i>u</i> <sub>301</sub> ) | 0.4514 | 0.1603  |
| <i>u</i> <sub>384</sub> | C(21)...H(108) | 7.9197(1423) | 0.7147(tied to <i>u</i> <sub>301</sub> ) | 0.6875 | 0.1943  |
| <i>u</i> <sub>385</sub> | C(53)...H(79)  | 8.3552(1126) | 1.4584(tied to <i>u</i> <sub>301</sub> ) | 1.4312 | -0.1752 |
| <i>u</i> <sub>386</sub> | C(37)...C(46)  | 7.6046(574)  | 1.4715(tied to <i>u</i> <sub>304</sub> ) | 1.0233 | 0.5875  |
| <i>u</i> <sub>387</sub> | C(21)...H(102) | 8.1404(465)  | 0.6631(tied to <i>u</i> <sub>301</sub> ) | 0.6359 | 0.1453  |
| <i>u</i> <sub>388</sub> | C(21)...H(106) | 7.9785(1349) | 0.6799(tied to <i>u</i> <sub>301</sub> ) | 0.6527 | 0.1684  |
| <i>u</i> <sub>389</sub> | C(21)...C(33)  | 7.9940(303)  | 1.1027(tied to <i>u</i> <sub>304</sub> ) | 0.6545 | 0.2013  |
| <i>u</i> <sub>390</sub> | H(69)...H(102) | 7.7138(1228) | 2.0223(tied to <i>u</i> <sub>301</sub> ) | 1.995  | 0.6523  |
| <i>u</i> <sub>391</sub> | O(13)...H(97)  | 8.0399(460)  | 0.7144(tied to <i>u</i> <sub>301</sub> ) | 0.6872 | 0.2514  |
| <i>u</i> <sub>392</sub> | Si(1)...H(91)  | 8.2168(483)  | 0.5932(tied to <i>u</i> <sub>301</sub> ) | 0.5659 | -0.0429 |
| <i>u</i> <sub>393</sub> | O(13)...H(87)  | 7.9477(660)  | 0.7193(tied to <i>u</i> <sub>301</sub> ) | 0.6921 | 0.2807  |

|           |                |              |                            |        |         |
|-----------|----------------|--------------|----------------------------|--------|---------|
| $u_{394}$ | H(69)...H(79)  | 8.0883(765)  | 1.1881(tied to $u_{301}$ ) | 1.1609 | 0.2601  |
| $u_{395}$ | C(37)...H(82)  | 7.5717(481)  | 0.9561(tied to $u_{301}$ ) | 0.9288 | 0.7527  |
| $u_{396}$ | C(29)...H(102) | 8.1066(858)  | 1.3310(tied to $u_{301}$ ) | 1.3037 | 0.3015  |
| $u_{397}$ | Si(1)...H(95)  | 8.3650(616)  | 0.6386(tied to $u_{301}$ ) | 0.6113 | -0.0292 |
| $u_{398}$ | C(45)...H(84)  | 7.4405(743)  | 1.5963(tied to $u_{301}$ ) | 1.5691 | 0.8651  |
| $u_{399}$ | C(29)...C(60)  | 7.6570(787)  | 1.3917(tied to $u_{304}$ ) | 0.9434 | 0.6167  |
| $u_{400}$ | C(37)...H(73)  | 7.9867(380)  | 1.5818(tied to $u_{301}$ ) | 1.5546 | 0.3386  |
| $u_{401}$ | C(53)...C(62)  | 8.0324(1068) | 1.6704(tied to $u_{304}$ ) | 1.2221 | 0.3793  |
| $u_{402}$ | C(29)...H(92)  | 7.7347(1068) | 1.5116(tied to $u_{301}$ ) | 1.4843 | 0.6307  |
| $u_{403}$ | C(21)...H(98)  | 7.9307(907)  | 0.7882(tied to $u_{301}$ ) | 0.761  | 0.4724  |
| $u_{404}$ | Si(1)...C(47)  | 8.1829(451)  | 0.3715(tied to $u_{301}$ ) | 0.3443 | 0.2332  |
| $u_{405}$ | O(9)...H(86)   | 8.1012(442)  | 0.6466(tied to $u_{301}$ ) | 0.6193 | 0.3038  |
| $u_{406}$ | C(61)...H(92)  | 7.9645(1568) | 1.9159(tied to $u_{301}$ ) | 1.8887 | 0.5690  |
| $u_{407}$ | H(77)...H(95)  | 8.5779(1390) | 1.8175(tied to $u_{301}$ ) | 1.7902 | -0.1203 |
| $u_{408}$ | H(69)...H(86)  | 7.7023(583)  | 1.9011(tied to $u_{301}$ ) | 1.8739 | 0.7962  |
| $u_{409}$ | O(9)...H(99)   | 8.1324(408)  | 0.6116(tied to $u_{301}$ ) | 0.5843 | 0.3041  |
| $u_{410}$ | C(37)...C(66)  | 7.9566(1333) | 1.2666(tied to $u_{304}$ ) | 0.8184 | 0.4754  |
| $u_{411}$ | H(77)...H(81)  | 8.1462(1471) | 1.3516(tied to $u_{301}$ ) | 1.3244 | 0.5118  |
| $u_{412}$ | Si(1)...C(59)  | 8.2502(250)  | 0.2936(tied to $u_{301}$ ) | 0.2663 | 0.2374  |
| $u_{413}$ | C(61)...C(62)  | 8.3307(1332) | 1.4639(tied to $u_{304}$ ) | 1.0156 | 0.2422  |
| $u_{414}$ | H(69)...H(83)  | 8.3211(994)  | 1.0333(tied to $u_{301}$ ) | 1.0061 | 0.1465  |
| $u_{415}$ | C(37)...H(81)  | 8.3355(1186) | 1.1948(tied to $u_{301}$ ) | 1.1676 | 0.3560  |
| $u_{416}$ | C(45)...C(46)  | 8.0581(946)  | 1.6600(tied to $u_{304}$ ) | 1.2118 | 0.5221  |
| $u_{417}$ | C(21)...H(86)  | 8.0935(271)  | 0.6549(tied to $u_{301}$ ) | 0.6276 | 0.4858  |
| $u_{418}$ | C(29)...C(68)  | 8.0116(986)  | 1.2338(tied to $u_{304}$ ) | 0.7856 | 0.5181  |
| $u_{419}$ | C(61)...C(66)  | 8.2390(2703) | 1.4504(tied to $u_{304}$ ) | 1.0022 | 0.2527  |
| $u_{420}$ | C(45)...H(70)  | 7.7876(734)  | 1.2083(tied to $u_{301}$ ) | 1.181  | 0.7252  |
| $u_{421}$ | C(29)...C(41)  | 8.4468(385)  | 1.5559(tied to $u_{304}$ ) | 1.1077 | 0.2003  |
| $u_{422}$ | C(37)...H(102) | 8.2972(634)  | 1.2290(tied to $u_{301}$ ) | 1.2018 | 0.3793  |
| $u_{423}$ | Si(1)...C(65)  | 8.5619(427)  | 0.3274(tied to $u_{301}$ ) | 0.3001 | 0.1334  |
| $u_{424}$ | C(21)...C(31)  | 8.3686(501)  | 0.9358(tied to $u_{304}$ ) | 0.4876 | 0.3056  |
| $u_{425}$ | O(13)...H(86)  | 8.3153(304)  | 0.4011(tied to $u_{301}$ ) | 0.3738 | 0.3506  |
| $u_{426}$ | Si(1)...H(97)  | 8.6220(505)  | 0.7136(tied to $u_{301}$ ) | 0.6864 | 0.1334  |
| $u_{427}$ | H(77)...H(82)  | 7.9061(474)  | 1.0116(tied to $u_{301}$ ) | 0.9844 | 0.8405  |
| $u_{428}$ | C(29)...C(51)  | 8.8228(999)  | 1.2084(tied to $u_{304}$ ) | 0.7602 | -0.2408 |
| $u_{429}$ | Si(1)...C(63)  | 8.5765(488)  | 0.3215(tied to $u_{301}$ ) | 0.2943 | 0.1386  |
| $u_{430}$ | C(37)...C(58)  | 8.0536(1032) | 1.2805(tied to $u_{304}$ ) | 0.8323 | 0.6397  |
| $u_{431}$ | O(13)...H(98)  | 8.3490(255)  | 0.3691(tied to $u_{301}$ ) | 0.3419 | 0.3422  |
| $u_{432}$ | C(37)...C(41)  | 8.6339(901)  | 1.2585(tied to $u_{304}$ ) | 0.8103 | 0.2143  |
| $u_{433}$ | Si(1)...C(67)  | 8.5537(295)  | 0.3062(tied to $u_{301}$ ) | 0.2789 | 0.1486  |
| $u_{434}$ | C(29)...H(86)  | 8.1686(290)  | 1.2644(tied to $u_{301}$ ) | 1.2371 | 0.5979  |
| $u_{435}$ | C(45)...H(98)  | 8.2473(2144) | 1.2515(tied to $u_{301}$ ) | 1.2243 | 0.4473  |
| $u_{436}$ | C(45)...H(102) | 8.5510(1220) | 1.4694(tied to $u_{301}$ ) | 1.4422 | 0.3456  |
| $u_{437}$ | C(29)...C(39)  | 8.6684(744)  | 1.1416(tied to $u_{304}$ ) | 0.6934 | 0.1715  |



|                         |                |              |                                          |        |         |
|-------------------------|----------------|--------------|------------------------------------------|--------|---------|
| <i>u</i> <sub>438</sub> | C(21)...C(43)  | 8.4922(547)  | 0.8067(tied to <i>u</i> <sub>304</sub> ) | 0.3585 | 0.2999  |
| <i>u</i> <sub>439</sub> | C(21)...H(71)  | 8.3492(480)  | 0.7755(tied to <i>u</i> <sub>301</sub> ) | 0.7482 | 0.4675  |
| <i>u</i> <sub>440</sub> | H(77)...H(102) | 8.1290(869)  | 1.8198(tied to <i>u</i> <sub>301</sub> ) | 1.7926 | 0.7124  |
| <i>u</i> <sub>441</sub> | C(29)...H(91)  | 9.0538(1121) | 0.9997(tied to <i>u</i> <sub>301</sub> ) | 0.9725 | -0.3577 |
| <i>u</i> <sub>442</sub> | O(9)...H(102)  | 8.7777(435)  | 0.4792(420)                              | 0.3868 | 0.1441  |
| <i>u</i> <sub>443</sub> | Si(1)...H(89)  | 8.6075(696)  | 0.7661(tied to <i>u</i> <sub>442</sub> ) | 0.6737 | 0.2165  |
| <i>u</i> <sub>444</sub> | O(13)...H(105) | 8.7175(690)  | 0.4909(tied to <i>u</i> <sub>442</sub> ) | 0.3985 | 0.1555  |
| <i>u</i> <sub>445</sub> | O(13)...H(102) | 8.7723(479)  | 0.4635(tied to <i>u</i> <sub>442</sub> ) | 0.371  | 0.1470  |
| <i>u</i> <sub>446</sub> | O(13)...H(103) | 8.7034(707)  | 0.4975(tied to <i>u</i> <sub>442</sub> ) | 0.4051 | 0.1652  |
| <i>u</i> <sub>447</sub> | C(37)...C(55)  | 9.0558(1149) | 1.0027(308)                              | 0.9863 | -0.1474 |
| <i>u</i> <sub>448</sub> | O(9)...H(107)  | 8.6896(467)  | 0.4809(tied to <i>u</i> <sub>442</sub> ) | 0.3885 | 0.1715  |
| <i>u</i> <sub>449</sub> | O(13)...H(106) | 8.6996(478)  | 0.4567(tied to <i>u</i> <sub>442</sub> ) | 0.3643 | 0.1641  |
| <i>u</i> <sub>450</sub> | C(21)...C(51)  | 8.8529(818)  | 0.5509(tied to <i>u</i> <sub>447</sub> ) | 0.5346 | -0.0088 |
| <i>u</i> <sub>451</sub> | C(61)...H(75)  | 9.0757(1016) | 1.1021(tied to <i>u</i> <sub>442</sub> ) | 1.0097 | -0.2607 |
| <i>u</i> <sub>452</sub> | O(13)...C(51)  | 8.7895(285)  | 0.3559(370)                              | 0.338  | 0.0886  |
| <i>u</i> <sub>453</sub> | O(9)...C(55)   | 8.8913(311)  | 0.3589(tied to <i>u</i> <sub>452</sub> ) | 0.3409 | 0.0784  |
| <i>u</i> <sub>454</sub> | C(21)...C(55)  | 8.8851(768)  | 0.6153(tied to <i>u</i> <sub>447</sub> ) | 0.599  | 0.0782  |
| <i>u</i> <sub>455</sub> | C(45)...H(92)  | 8.2559(1150) | 1.8164(tied to <i>u</i> <sub>442</sub> ) | 1.724  | 0.6983  |
| <i>u</i> <sub>456</sub> | C(45)...C(60)  | 8.3010(957)  | 1.1211(tied to <i>u</i> <sub>447</sub> ) | 1.1047 | 0.6413  |
| <i>u</i> <sub>457</sub> | C(61)...H(100) | 8.3136(1381) | 1.8186(tied to <i>u</i> <sub>442</sub> ) | 1.7262 | 0.6409  |
| <i>u</i> <sub>458</sub> | C(21)...H(83)  | 8.5911(531)  | 0.6076(tied to <i>u</i> <sub>442</sub> ) | 0.5152 | 0.4259  |
| <i>u</i> <sub>459</sub> | C(53)...H(70)  | 8.1096(709)  | 1.0722(tied to <i>u</i> <sub>442</sub> ) | 0.9798 | 0.8363  |
| <i>u</i> <sub>460</sub> | C(45)...H(79)  | 9.0916(1126) | 1.1157(tied to <i>u</i> <sub>442</sub> ) | 1.0233 | -0.0121 |
| <i>u</i> <sub>461</sub> | C(37)...H(71)  | 8.6717(704)  | 1.0668(tied to <i>u</i> <sub>442</sub> ) | 0.9744 | 0.3924  |
| <i>u</i> <sub>462</sub> | C(29)...H(100) | 8.1668(999)  | 1.4068(tied to <i>u</i> <sub>442</sub> ) | 1.3143 | 0.7960  |
| <i>u</i> <sub>463</sub> | H(69)...H(92)  | 8.1241(854)  | 1.6530(tied to <i>u</i> <sub>442</sub> ) | 1.5606 | 0.8210  |
| <i>u</i> <sub>464</sub> | O(13)...C(56)  | 8.9457(266)  | 0.3677(tied to <i>u</i> <sub>452</sub> ) | 0.3497 | 0.1255  |
| <i>u</i> <sub>465</sub> | C(53)...C(66)  | 8.4926(2090) | 0.9665(tied to <i>u</i> <sub>447</sub> ) | 0.9501 | 0.4923  |
| <i>u</i> <sub>466</sub> | C(61)...H(79)  | 9.2663(1213) | 1.2426(tied to <i>u</i> <sub>442</sub> ) | 1.1502 | -0.1468 |
| <i>u</i> <sub>467</sub> | C(61)...H(82)  | 8.3326(963)  | 1.1859(tied to <i>u</i> <sub>442</sub> ) | 1.0935 | 0.7201  |
| <i>u</i> <sub>468</sub> | C(53)...H(75)  | 9.0468(994)  | 1.0903(tied to <i>u</i> <sub>442</sub> ) | 0.9979 | -0.0722 |
| <i>u</i> <sub>469</sub> | C(29)...H(73)  | 8.4776(888)  | 1.1622(tied to <i>u</i> <sub>442</sub> ) | 1.0698 | 0.5266  |
| <i>u</i> <sub>470</sub> | O(13)...C(48)  | 8.9191(298)  | 0.3632(tied to <i>u</i> <sub>452</sub> ) | 0.3453 | 0.1626  |
| <i>u</i> <sub>471</sub> | C(53)...H(102) | 8.7330(1092) | 1.4330(tied to <i>u</i> <sub>442</sub> ) | 1.3406 | 0.4155  |
| <i>u</i> <sub>472</sub> | C(29)...C(33)  | 8.7260(732)  | 0.7610(tied to <i>u</i> <sub>447</sub> ) | 0.7446 | 0.3534  |
| <i>u</i> <sub>473</sub> | C(45)...C(68)  | 8.6036(1131) | 0.9462(tied to <i>u</i> <sub>447</sub> ) | 0.9298 | 0.5247  |
| <i>u</i> <sub>474</sub> | H(69)...H(73)  | 8.3379(1040) | 1.2421(tied to <i>u</i> <sub>442</sub> ) | 1.1497 | 0.6869  |
| <i>u</i> <sub>475</sub> | C(37)...H(95)  | 9.3424(1392) | 1.4116(tied to <i>u</i> <sub>442</sub> ) | 1.3192 | -0.1783 |
| <i>u</i> <sub>476</sub> | C(21)...C(24)  | 9.0751(36)   | 0.1558(tied to <i>u</i> <sub>447</sub> ) | 0.1394 | 0.1152  |
| <i>u</i> <sub>477</sub> | C(61)...H(108) | 8.9249(1706) | 1.2613(tied to <i>u</i> <sub>442</sub> ) | 1.1689 | 0.2914  |
| <i>u</i> <sub>478</sub> | C(61)...H(102) | 8.9816(1329) | 1.2440(tied to <i>u</i> <sub>442</sub> ) | 1.1516 | 0.2758  |
| <i>u</i> <sub>479</sub> | C(21)...H(91)  | 9.1837(963)  | 0.8497(tied to <i>u</i> <sub>442</sub> ) | 0.7573 | -0.1024 |
| <i>u</i> <sub>480</sub> | C(21)...C(57)  | 9.1654(575)  | 0.6765(tied to <i>u</i> <sub>447</sub> ) | 0.6601 | 0.1391  |
| <i>u</i> <sub>481</sub> | C(53)...H(82)  | 8.4353(768)  | 1.1272(tied to <i>u</i> <sub>442</sub> ) | 1.0348 | 0.8206  |

|                         |                |              |                                          |        |         |
|-------------------------|----------------|--------------|------------------------------------------|--------|---------|
| <i>u</i> <sub>482</sub> | C(61)...H(106) | 8.8543(3063) | 1.2363(tied to <i>u</i> <sub>442</sub> ) | 1.1439 | 0.2925  |
| <i>u</i> <sub>483</sub> | C(37)...H(86)  | 8.4933(556)  | 1.1619(tied to <i>u</i> <sub>442</sub> ) | 1.0695 | 0.7505  |
| <i>u</i> <sub>484</sub> | O(9)...C(47)   | 9.0577(243)  | 0.3126(tied to <i>u</i> <sub>452</sub> ) | 0.2946 | 0.2046  |
| <i>u</i> <sub>485</sub> | C(21)...H(95)  | 9.3635(959)  | 0.9308(tied to <i>u</i> <sub>442</sub> ) | 0.8384 | -0.0649 |
| <i>u</i> <sub>486</sub> | C(29)...H(83)  | 8.9019(801)  | 0.8365(tied to <i>u</i> <sub>442</sub> ) | 0.7441 | 0.3174  |
| <i>u</i> <sub>487</sub> | C(61)...H(70)  | 8.4407(868)  | 1.0293(tied to <i>u</i> <sub>442</sub> ) | 0.9369 | 0.7666  |
| <i>u</i> <sub>488</sub> | Si(1)...H(87)  | 8.9446(450)  | 0.5676(tied to <i>u</i> <sub>442</sub> ) | 0.4752 | 0.3192  |
| <i>u</i> <sub>489</sub> | O(13)...C(59)  | 9.0831(137)  | 0.2809(tied to <i>u</i> <sub>452</sub> ) | 0.2629 | 0.2018  |
| <i>u</i> <sub>490</sub> | C(45)...H(81)  | 9.0916(684)  | 1.7153(tied to <i>u</i> <sub>442</sub> ) | 1.6229 | 0.2840  |
| <i>u</i> <sub>491</sub> | C(37)...H(106) | 8.7601(1509) | 0.9976(tied to <i>u</i> <sub>442</sub> ) | 0.9052 | 0.5173  |
| <i>u</i> <sub>492</sub> | H(77)...H(86)  | 8.3603(718)  | 1.6755(tied to <i>u</i> <sub>442</sub> ) | 1.5831 | 0.9965  |
| <i>u</i> <sub>493</sub> | C(21)...C(49)  | 9.1913(500)  | 0.6612(tied to <i>u</i> <sub>447</sub> ) | 0.6449 | 0.2054  |
| <i>u</i> <sub>494</sub> | Si(1)...H(99)  | 9.0689(226)  | 0.4432(tied to <i>u</i> <sub>442</sub> ) | 0.3508 | 0.3198  |
| <i>u</i> <sub>495</sub> | C(53)...C(58)  | 8.7075(1638) | 0.9687(tied to <i>u</i> <sub>447</sub> ) | 0.9524 | 0.6892  |
| <i>u</i> <sub>496</sub> | C(29)...H(108) | 8.8023(1260) | 0.9814(tied to <i>u</i> <sub>442</sub> ) | 0.889  | 0.5696  |
| <i>u</i> <sub>497</sub> | O(13)...H(91)  | 9.3473(409)  | 0.5541(tied to <i>u</i> <sub>442</sub> ) | 0.4617 | 0.0635  |
| <i>u</i> <sub>498</sub> | Si(1)...C(56)  | 9.3975(174)  | 0.3044(tied to <i>u</i> <sub>442</sub> ) | 0.212  | 0.1300  |
| <i>u</i> <sub>499</sub> | O(9)...H(95)   | 9.5073(466)  | 0.5662(tied to <i>u</i> <sub>442</sub> ) | 0.4738 | 0.0515  |
| <i>u</i> <sub>500</sub> | Si(1)...C(48)  | 9.3441(183)  | 0.3033(tied to <i>u</i> <sub>442</sub> ) | 0.2109 | 0.1494  |
| <i>u</i> <sub>501</sub> | C(53)...H(73)  | 9.1753(662)  | 1.7262(tied to <i>u</i> <sub>442</sub> ) | 1.6338 | 0.3790  |
| <i>u</i> <sub>502</sub> | C(45)...H(86)  | 8.8594(732)  | 1.4367(tied to <i>u</i> <sub>442</sub> ) | 1.3443 | 0.7035  |
| <i>u</i> <sub>503</sub> | C(21)...H(80)  | 9.5686(397)  | 0.5020(tied to <i>u</i> <sub>442</sub> ) | 0.4096 | 0.0905  |
| <i>u</i> <sub>504</sub> | C(45)...H(100) | 8.7022(1248) | 1.6407(tied to <i>u</i> <sub>442</sub> ) | 1.5482 | 0.8693  |
| <i>u</i> <sub>505</sub> | C(21)...H(72)  | 9.4446(421)  | 0.4990(tied to <i>u</i> <sub>442</sub> ) | 0.4066 | 0.1461  |
| <i>u</i> <sub>506</sub> | C(53)...H(81)  | 9.4286(1191) | 1.3757(tied to <i>u</i> <sub>442</sub> ) | 1.2833 | 0.3737  |
| <i>u</i> <sub>507</sub> | O(13)...C(64)  | 9.5357(230)  | 0.2851(tied to <i>u</i> <sub>452</sub> ) | 0.2671 | 0.1579  |
| <i>u</i> <sub>508</sub> | O(9)...C(63)   | 9.5730(265)  | 0.2839(tied to <i>u</i> <sub>452</sub> ) | 0.2659 | 0.1590  |
| <i>u</i> <sub>509</sub> | C(37)...H(98)  | 8.9068(1023) | 1.0728(tied to <i>u</i> <sub>442</sub> ) | 0.9804 | 0.7930  |
| <i>u</i> <sub>510</sub> | Si(1)...H(105) | 9.5704(537)  | 0.4419(tied to <i>u</i> <sub>442</sub> ) | 0.3495 | 0.1608  |
| <i>u</i> <sub>511</sub> | O(13)...H(96)  | 9.6217(367)  | 0.5876(tied to <i>u</i> <sub>442</sub> ) | 0.4952 | 0.1338  |
| <i>u</i> <sub>512</sub> | O(13)...C(67)  | 9.5280(168)  | 0.2789(tied to <i>u</i> <sub>452</sub> ) | 0.2609 | 0.1658  |
| <i>u</i> <sub>513</sub> | Si(1)...H(103) | 9.5781(574)  | 0.4342(tied to <i>u</i> <sub>442</sub> ) | 0.3418 | 0.1676  |
| <i>u</i> <sub>514</sub> | C(37)...C(49)  | 9.5983(737)  | 1.1629(tied to <i>u</i> <sub>447</sub> ) | 1.1466 | 0.2121  |
| <i>u</i> <sub>515</sub> | H(69)...H(100) | 8.6818(886)  | 1.3575(tied to <i>u</i> <sub>442</sub> ) | 1.2651 | 0.9959  |
| <i>u</i> <sub>516</sub> | Si(1)...H(107) | 9.5455(323)  | 0.4160(tied to <i>u</i> <sub>442</sub> ) | 0.3236 | 0.1784  |
| <i>u</i> <sub>517</sub> | H(77)...H(89)  | 9.4933(779)  | 2.0158(tied to <i>u</i> <sub>442</sub> ) | 1.9234 | 0.3326  |
| <i>u</i> <sub>518</sub> | C(45)...C(51)  | 9.8255(1177) | 0.8635(tied to <i>u</i> <sub>447</sub> ) | 0.8471 | -0.1985 |
| <i>u</i> <sub>519</sub> | C(21)...C(47)  | 9.5051(812)  | 0.5220(tied to <i>u</i> <sub>447</sub> ) | 0.5056 | 0.3087  |
| <i>u</i> <sub>520</sub> | C(29)...C(57)  | 9.6227(725)  | 1.1633(tied to <i>u</i> <sub>447</sub> ) | 1.147  | 0.2272  |
| <i>u</i> <sub>521</sub> | C(53)...H(106) | 9.1857(2357) | 1.1632(tied to <i>u</i> <sub>442</sub> ) | 1.0708 | 0.5448  |
| <i>u</i> <sub>522</sub> | C(21)...H(97)  | 9.7186(738)  | 1.0773(tied to <i>u</i> <sub>442</sub> ) | 0.9849 | 0.1910  |
| <i>u</i> <sub>523</sub> | O(13)...H(88)  | 9.5635(502)  | 0.5761(tied to <i>u</i> <sub>442</sub> ) | 0.4837 | 0.1948  |
| <i>u</i> <sub>524</sub> | H(69)...H(107) | 9.9386(1073) | 1.1649(tied to <i>u</i> <sub>442</sub> ) | 1.0724 | -0.2529 |
| <i>u</i> <sub>525</sub> | C(37)...C(47)  | 9.7147(1163) | 0.7594(tied to <i>u</i> <sub>447</sub> ) | 0.743  | 0.1522  |

|           |                |               |                            |        |         |
|-----------|----------------|---------------|----------------------------|--------|---------|
| $u_{526}$ | C(45)...H(91)  | 9.9650(1341)  | 1.1803(tied to $u_{442}$ ) | 1.0879 | -0.3352 |
| $u_{527}$ | C(29)...C(67)  | 9.7546(966)   | 0.7052(tied to $u_{447}$ ) | 0.6888 | -0.0370 |
| $u_{528}$ | C(21)...C(65)  | 9.7546(566)   | 0.4704(tied to $u_{447}$ ) | 0.454  | 0.1549  |
| $u_{529}$ | C(37)...C(63)  | 9.9232(1283)  | 0.7792(tied to $u_{447}$ ) | 0.7628 | -0.0181 |
| $u_{530}$ | C(37)...C(57)  | 9.7602(1016)  | 0.8853(tied to $u_{447}$ ) | 0.869  | 0.2268  |
| $u_{531}$ | C(29)...C(31)  | 9.3487(593)   | 0.6190(tied to $u_{447}$ ) | 0.6027 | 0.5121  |
| $u_{532}$ | H(77)...H(87)  | 9.8170(1300)  | 1.2478(tied to $u_{442}$ ) | 1.1554 | 0.1268  |
| $u_{533}$ | C(45)...H(108) | 9.2838(1465)  | 1.1596(tied to $u_{442}$ ) | 1.0672 | 0.5882  |
| $u_{534}$ | C(21)...C(63)  | 9.7870(883)   | 0.4564(tied to $u_{447}$ ) | 0.44   | 0.1644  |
| $u_{535}$ | H(69)...H(97)  | 9.5807(609)   | 2.0341(tied to $u_{442}$ ) | 1.9417 | 0.3858  |
| $u_{536}$ | H(69)...H(80)  | 9.8182(502)   | 0.7911(tied to $u_{442}$ ) | 0.6987 | 0.0946  |
| $u_{537}$ | C(29)...C(59)  | 9.6988(895)   | 0.6988(tied to $u_{447}$ ) | 0.6824 | 0.1417  |
| $u_{538}$ | C(21)...C(59)  | 9.5781(651)   | 0.4094(tied to $u_{447}$ ) | 0.393  | 0.3133  |
| $u_{539}$ | C(53)...C(55)  | 10.1113(1664) | 1.0703(tied to $u_{447}$ ) | 1.0539 | -0.1256 |
| $u_{540}$ | C(21)...C(40)  | 9.8785(218)   | 0.2577(tied to $u_{447}$ ) | 0.2414 | 0.1213  |
| $u_{541}$ | H(77)...H(103) | 10.1443(1420) | 1.3169(tied to $u_{442}$ ) | 1.2245 | -0.1340 |
| $u_{542}$ | H(77)...H(106) | 9.1665(1091)  | 1.2596(tied to $u_{442}$ ) | 1.1671 | 0.7706  |
| $u_{543}$ | C(21)...C(32)  | 9.8101(223)   | 0.2567(tied to $u_{447}$ ) | 0.2403 | 0.1514  |
| $u_{544}$ | C(21)...C(67)  | 9.7463(745)   | 0.4280(tied to $u_{447}$ ) | 0.4117 | 0.1756  |
| $u_{545}$ | C(61)...H(81)  | 9.8127(1001)  | 1.5075(tied to $u_{442}$ ) | 1.415  | 0.3094  |
| $u_{546}$ | C(61)...H(98)  | 9.2342(2100)  | 1.2771(tied to $u_{442}$ ) | 1.1847 | 0.7154  |
| $u_{547}$ | C(29)...H(71)  | 9.3496(496)   | 0.8400(tied to $u_{442}$ ) | 0.7476 | 0.6400  |
| $u_{548}$ | C(53)...H(86)  | 9.1606(915)   | 1.2760(tied to $u_{442}$ ) | 1.1836 | 0.8411  |
| $u_{549}$ | C(37)...C(43)  | 9.5174(486)   | 0.4402(tied to $u_{447}$ ) | 0.4238 | 0.5213  |
| $u_{550}$ | O(9)...H(87)   | 9.7680(259)   | 0.4764(tied to $u_{442}$ ) | 0.384  | 0.2596  |
| $u_{551}$ | H(69)...H(99)  | 9.8887(1031)  | 1.1847(tied to $u_{442}$ ) | 1.0923 | 0.0595  |
| $u_{552}$ | C(29)...C(55)  | 9.8700(1046)  | 0.7750(tied to $u_{447}$ ) | 0.7587 | 0.2441  |
| $u_{553}$ | C(21)...H(89)  | 9.7516(772)   | 1.0485(tied to $u_{442}$ ) | 0.9561 | 0.2984  |
| $u_{554}$ | H(77)...H(80)  | 10.0875(1009) | 0.7894(tied to $u_{442}$ ) | 0.697  | 0.1499  |
| $u_{555}$ | O(13)...H(99)  | 9.8456(164)   | 0.4250(tied to $u_{442}$ ) | 0.3326 | 0.2520  |
| $u_{556}$ | H(69)...H(71)  | 9.3401(485)   | 0.8530(tied to $u_{442}$ ) | 0.7606 | 0.7186  |
| $u_{557}$ | C(53)...H(95)  | 10.3161(1986) | 1.5115(tied to $u_{442}$ ) | 1.419  | -0.1737 |
| $u_{558}$ | Si(1)...C(64)  | 9.9784(46)    | 0.2470(tied to $u_{442}$ ) | 0.1546 | 0.1593  |
| $u_{559}$ | C(61)...H(86)  | 9.4168(1021)  | 1.1652(tied to $u_{442}$ ) | 1.0728 | 0.7394  |
| $u_{560}$ | H(69)...H(72)  | 9.8482(728)   | 0.7586(tied to $u_{442}$ ) | 0.6662 | 0.2640  |
| $u_{561}$ | H(69)...H(108) | 9.2665(1110)  | 1.1207(tied to $u_{442}$ ) | 1.0283 | 0.8297  |
| $u_{562}$ | Si(1)...H(96)  | 10.0885(292)  | 0.4150(tied to $u_{442}$ ) | 0.3226 | 0.1373  |
| $u_{563}$ | C(37)...H(83)  | 9.5831(452)   | 0.6508(tied to $u_{442}$ ) | 0.5584 | 0.6367  |
| $u_{564}$ | Si(1)...H(88)  | 9.9856(308)   | 0.4101(tied to $u_{442}$ ) | 0.3177 | 0.1688  |
| $u_{565}$ | C(45)...H(73)  | 9.6058(1027)  | 1.2847(tied to $u_{442}$ ) | 1.1923 | 0.5513  |
| $u_{566}$ | C(37)...C(51)  | 9.8927(888)   | 0.6845(tied to $u_{447}$ ) | 0.6681 | 0.2376  |
| $u_{567}$ | H(77)...H(83)  | 9.5815(474)   | 0.7677(tied to $u_{442}$ ) | 0.6753 | 0.7309  |
| $u_{568}$ | C(29)...H(97)  | 10.0731(772)  | 1.5814(tied to $u_{442}$ ) | 1.489  | 0.2596  |
| $u_{569}$ | C(29)...C(49)  | 9.8712(962)   | 0.8180(tied to $u_{447}$ ) | 0.8017 | 0.3647  |

|           |                |               |                            |        |         |
|-----------|----------------|---------------|----------------------------|--------|---------|
| $u_{570}$ | H(77)...H(98)  | 9.3268(757)   | 1.1921(tied to $u_{442}$ ) | 1.0997 | 0.9418  |
| $u_{571}$ | C(29)...H(80)  | 10.2393(281)  | 0.6049(tied to $u_{442}$ ) | 0.5125 | 0.1046  |
| $u_{572}$ | C(37)...H(89)  | 10.0536(972)  | 1.5758(tied to $u_{442}$ ) | 1.4834 | 0.2928  |
| $u_{573}$ | C(37)...C(65)  | 10.2411(965)  | 0.9136(tied to $u_{447}$ ) | 0.8973 | 0.1958  |
| $u_{574}$ | C(37)...H(72)  | 10.1733(370)  | 0.6115(tied to $u_{442}$ ) | 0.5191 | 0.1319  |
| $u_{575}$ | C(53)...H(71)  | 9.9045(906)   | 1.1447(tied to $u_{442}$ ) | 1.0523 | 0.4799  |
| $u_{576}$ | C(29)...H(95)  | 10.2432(1298) | 1.0584(tied to $u_{442}$ ) | 0.966  | 0.1682  |
| $u_{577}$ | H(77)...H(97)  | 10.0648(1383) | 1.4927(tied to $u_{442}$ ) | 1.4003 | 0.4864  |
| $u_{578}$ | C(37)...H(80)  | 10.3868(701)  | 0.6042(tied to $u_{442}$ ) | 0.5118 | 0.1341  |
| $u_{579}$ | C(61)...H(73)  | 9.9562(949)   | 1.4856(tied to $u_{442}$ ) | 1.3932 | 0.4586  |
| $u_{580}$ | C(53)...H(98)  | 9.5195(1637)  | 1.2338(tied to $u_{442}$ ) | 1.1414 | 0.8810  |
| $u_{581}$ | C(29)...H(72)  | 10.1890(553)  | 0.4972(440)                | 0.494  | 0.2232  |
| $u_{582}$ | C(37)...H(91)  | 10.2035(1087) | 0.9029(tied to $u_{581}$ ) | 0.8997 | 0.1496  |
| $u_{583}$ | C(37)...H(97)  | 10.3342(1199) | 1.1090(tied to $u_{581}$ ) | 1.1058 | 0.3204  |
| $u_{584}$ | C(29)...C(65)  | 10.3156(963)  | 0.8798(tied to $u_{581}$ ) | 0.8766 | 0.2801  |
| $u_{585}$ | C(45)...H(83)  | 10.1136(891)  | 0.7948(tied to $u_{581}$ ) | 0.7916 | 0.4152  |
| $u_{586}$ | H(69)...H(95)  | 10.2953(1161) | 1.2386(tied to $u_{581}$ ) | 1.2354 | 0.4329  |
| $u_{587}$ | C(21)...H(87)  | 10.2663(862)  | 0.6867(tied to $u_{581}$ ) | 0.6835 | 0.4365  |
| $u_{588}$ | C(37)...H(87)  | 10.4524(1276) | 0.9340(tied to $u_{581}$ ) | 0.9308 | 0.3033  |
| $u_{589}$ | C(29)...C(40)  | 10.5773(149)  | 0.3480(tied to $u_{581}$ ) | 0.3448 | 0.1451  |
| $u_{590}$ | C(29)...H(107) | 10.6282(1035) | 0.7620(tied to $u_{581}$ ) | 0.7588 | -0.0160 |
| $u_{591}$ | O(13)...H(104) | 10.5700(286)  | 0.2971(tied to $u_{581}$ ) | 0.2939 | 0.1873  |
| $u_{592}$ | C(37)...C(40)  | 10.6947(468)  | 0.3404(tied to $u_{581}$ ) | 0.3371 | 0.1458  |
| $u_{593}$ | O(9)...H(103)  | 10.6032(316)  | 0.2955(tied to $u_{581}$ ) | 0.2923 | 0.1894  |
| $u_{594}$ | C(37)...H(103) | 10.8155(1489) | 0.8444(tied to $u_{581}$ ) | 0.8412 | 0.0043  |
| $u_{595}$ | O(13)...H(107) | 10.5530(185)  | 0.2885(tied to $u_{581}$ ) | 0.2853 | 0.1967  |
| $u_{596}$ | C(29)...C(32)  | 10.5492(391)  | 0.3326(tied to $u_{581}$ ) | 0.3293 | 0.2090  |
| $u_{597}$ | C(21)...H(105) | 10.7089(729)  | 0.5308(tied to $u_{581}$ ) | 0.5275 | 0.1849  |
| $u_{598}$ | C(45)...C(57)  | 10.7096(1196) | 1.2097(tied to $u_{581}$ ) | 1.2065 | 0.2442  |
| $u_{599}$ | C(21)...H(99)  | 10.4080(604)  | 0.5017(tied to $u_{581}$ ) | 0.4985 | 0.4347  |
| $u_{600}$ | C(21)...H(103) | 10.7322(1026) | 0.5130(tied to $u_{581}$ ) | 0.5097 | 0.1964  |
| $u_{601}$ | C(29)...H(99)  | 10.5382(907)  | 0.7941(tied to $u_{581}$ ) | 0.7909 | 0.2792  |
| $u_{602}$ | C(53)...C(57)  | 10.8331(1355) | 0.9451(tied to $u_{581}$ ) | 0.9419 | 0.2431  |
| $u_{603}$ | H(77)...H(91)  | 10.4759(1141) | 0.9977(tied to $u_{581}$ ) | 0.9944 | 0.3485  |
| $u_{604}$ | H(77)...H(105) | 10.7303(1119) | 1.5014(tied to $u_{581}$ ) | 1.4982 | 0.3375  |
| $u_{605}$ | C(21)...H(107) | 10.6762(784)  | 0.4797(tied to $u_{581}$ ) | 0.4765 | 0.2089  |
| $u_{606}$ | C(45)...C(67)  | 10.7805(1165) | 0.7744(tied to $u_{581}$ ) | 0.7712 | 0.0317  |
| $u_{607}$ | C(53)...C(63)  | 10.9998(1802) | 0.8423(tied to $u_{581}$ ) | 0.8391 | 0.0324  |
| $u_{608}$ | C(29)...C(47)  | 10.4802(905)  | 0.6634(tied to $u_{581}$ ) | 0.6602 | 0.5449  |
| $u_{609}$ | C(29)...H(89)  | 10.4786(1231) | 1.0009(tied to $u_{581}$ ) | 0.9977 | 0.4876  |
| $u_{610}$ | C(45)...C(55)  | 10.8546(1577) | 0.8321(tied to $u_{581}$ ) | 0.8288 | 0.2290  |
| $u_{611}$ | C(61)...H(91)  | 10.9286(1353) | 1.0418(tied to $u_{581}$ ) | 1.0386 | -0.0987 |
| $u_{612}$ | H(69)...H(89)  | 10.2837(1252) | 1.2470(tied to $u_{581}$ ) | 1.2438 | 0.6780  |
| $u_{613}$ | C(29)...C(63)  | 10.7284(1070) | 0.6787(tied to $u_{581}$ ) | 0.6755 | 0.4196  |

|           |                |               |                            |        |         |
|-----------|----------------|---------------|----------------------------|--------|---------|
| $u_{614}$ | C(61)...H(95)  | 11.2324(2158) | 1.1643(tied to $u_{581}$ ) | 1.1611 | -0.0582 |
| $u_{615}$ | C(45)...C(59)  | 10.8025(1058) | 0.7542(tied to $u_{581}$ ) | 0.751  | 0.2325  |
| $u_{616}$ | C(37)...C(59)  | 10.6078(622)  | 0.4763(tied to $u_{581}$ ) | 0.4731 | 0.5635  |
| $u_{617}$ | Si(1)...H(104) | 11.0196(49)   | 0.1822(tied to $u_{581}$ ) | 0.179  | 0.1905  |
| $u_{618}$ | C(45)...H(71)  | 10.5102(699)  | 0.8384(tied to $u_{581}$ ) | 0.8352 | 0.6980  |
| $u_{619}$ | C(45)...H(95)  | 11.1501(1912) | 1.0770(tied to $u_{581}$ ) | 1.0738 | 0.1411  |
| $u_{620}$ | C(37)...H(105) | 11.1614(1151) | 0.9796(tied to $u_{581}$ ) | 0.9764 | 0.2261  |
| $u_{621}$ | C(37)...C(67)  | 10.7857(779)  | 0.5325(tied to $u_{581}$ ) | 0.5293 | 0.4342  |
| $u_{622}$ | C(45)...H(97)  | 11.1039(1288) | 1.6060(tied to $u_{581}$ ) | 1.6027 | 0.2962  |
| $u_{623}$ | C(45)...C(49)  | 10.9610(1337) | 0.8727(tied to $u_{581}$ ) | 0.8694 | 0.3797  |
| $u_{624}$ | C(53)...H(91)  | 11.0272(1272) | 1.0135(tied to $u_{581}$ ) | 1.0102 | 0.1277  |
| $u_{625}$ | C(21)...C(56)  | 11.2150(194)  | 0.2370(tied to $u_{581}$ ) | 0.2338 | 0.1573  |
| $u_{626}$ | C(61)...H(71)  | 10.7722(850)  | 0.9522(tied to $u_{581}$ ) | 0.9489 | 0.6233  |
| $u_{627}$ | C(21)...C(48)  | 11.1569(203)  | 0.2345(tied to $u_{581}$ ) | 0.2312 | 0.1835  |
| $u_{628}$ | H(69)...H(105) | 10.8943(1102) | 1.4764(tied to $u_{581}$ ) | 1.4731 | 0.4923  |
| $u_{629}$ | C(53)...C(65)  | 11.3189(1440) | 0.9452(tied to $u_{581}$ ) | 0.942  | 0.2151  |
| $u_{630}$ | C(53)...H(83)  | 10.7198(566)  | 0.6143(tied to $u_{581}$ ) | 0.6111 | 0.6984  |
| $u_{631}$ | C(53)...H(89)  | 11.1260(1463) | 1.5975(tied to $u_{581}$ ) | 1.5943 | 0.3481  |
| $u_{632}$ | C(29)...H(105) | 11.2480(1164) | 0.9897(375)                | 0.9518 | 0.3130  |
| $u_{633}$ | C(53)...H(97)  | 11.3453(1541) | 1.2788(tied to $u_{632}$ ) | 1.241  | 0.3473  |
| $u_{634}$ | C(61)...H(83)  | 10.9698(738)  | 0.7093(tied to $u_{632}$ ) | 0.6714 | 0.5963  |
| $u_{635}$ | C(45)...C(65)  | 11.3895(1445) | 0.9543(tied to $u_{632}$ ) | 0.9164 | 0.2910  |
| $u_{636}$ | C(45)...H(80)  | 11.5726(331)  | 0.5527(tied to $u_{632}$ ) | 0.5148 | 0.1370  |
| $u_{637}$ | C(53)...H(72)  | 11.4823(344)  | 0.5619(tied to $u_{632}$ ) | 0.524  | 0.1731  |
| $u_{638}$ | C(53)...H(80)  | 11.7025(644)  | 0.5484(tied to $u_{632}$ ) | 0.5106 | 0.1631  |
| $u_{639}$ | C(45)...H(72)  | 11.4991(551)  | 0.5348(tied to $u_{632}$ ) | 0.497  | 0.2535  |
| $u_{640}$ | C(45)...H(107) | 11.5997(1270) | 0.9357(tied to $u_{632}$ ) | 0.8978 | 0.0561  |
| $u_{641}$ | C(61)...H(97)  | 11.7522(1596) | 1.3880(tied to $u_{632}$ ) | 1.3501 | 0.2960  |
| $u_{642}$ | C(53)...H(87)  | 11.5834(1679) | 1.0830(tied to $u_{632}$ ) | 1.0451 | 0.4028  |
| $u_{643}$ | C(29)...H(87)  | 11.2561(882)  | 0.8074(tied to $u_{632}$ ) | 0.7696 | 0.6721  |
| $u_{644}$ | C(21)...C(64)  | 11.8050(47)   | 0.2060(tied to $u_{632}$ ) | 0.1681 | 0.1911  |
| $u_{645}$ | C(21)...H(96)  | 11.8825(341)  | 0.3928(tied to $u_{632}$ ) | 0.3549 | 0.1654  |
| $u_{646}$ | C(61)...C(65)  | 11.9022(1645) | 0.7674(tied to $u_{632}$ ) | 0.7296 | 0.2239  |
| $u_{647}$ | C(21)...H(88)  | 11.7703(354)  | 0.3854(tied to $u_{632}$ ) | 0.3475 | 0.2087  |
| $u_{648}$ | C(61)...C(63)  | 11.8870(1883) | 0.7388(tied to $u_{632}$ ) | 0.701  | 0.2369  |
| $u_{649}$ | C(45)...H(89)  | 11.5225(1617) | 1.1669(tied to $u_{632}$ ) | 1.1291 | 0.5185  |
| $u_{650}$ | C(29)...H(103) | 11.6677(1213) | 0.7810(tied to $u_{632}$ ) | 0.7431 | 0.4643  |
| $u_{651}$ | C(37)...C(48)  | 11.9220(157)  | 0.3803(tied to $u_{632}$ ) | 0.3424 | 0.1793  |
| $u_{652}$ | C(29)...C(56)  | 11.9038(139)  | 0.3835(tied to $u_{632}$ ) | 0.3456 | 0.1860  |
| $u_{653}$ | C(45)...C(47)  | 11.5535(1336) | 0.7726(tied to $u_{632}$ ) | 0.7348 | 0.5807  |
| $u_{654}$ | C(45)...C(63)  | 11.7394(1595) | 0.7800(tied to $u_{632}$ ) | 0.7421 | 0.4297  |
| $u_{655}$ | H(69)...H(87)  | 11.2948(637)  | 0.8977(tied to $u_{632}$ ) | 0.8599 | 0.8027  |
| $u_{656}$ | C(37)...C(56)  | 12.0250(429)  | 0.3706(tied to $u_{632}$ ) | 0.3327 | 0.1801  |
| $u_{657}$ | C(37)...H(99)  | 11.4206(548)  | 0.6012(tied to $u_{632}$ ) | 0.5634 | 0.6980  |

|           |                |               |                            |        |        |
|-----------|----------------|---------------|----------------------------|--------|--------|
| $u_{658}$ | C(61)...C(67)  | 11.7337(1134) | 0.6910(tied to $u_{632}$ ) | 0.6531 | 0.2720 |
| $u_{659}$ | C(45)...H(99)  | 11.6355(1085) | 0.9112(tied to $u_{632}$ ) | 0.8734 | 0.3908 |
| $u_{660}$ | C(29)...C(48)  | 11.8813(392)  | 0.3649(tied to $u_{632}$ ) | 0.3271 | 0.2422 |
| $u_{661}$ | C(61)...H(89)  | 11.8646(1743) | 1.3431(tied to $u_{632}$ ) | 1.3053 | 0.4199 |
| $u_{662}$ | C(37)...H(107) | 11.7081(838)  | 0.6336(tied to $u_{632}$ ) | 0.5957 | 0.4829 |
| $u_{663}$ | C(53)...C(67)  | 11.7284(979)  | 0.6468(tied to $u_{632}$ ) | 0.609  | 0.4577 |
| $u_{664}$ | H(77)...H(88)  | 12.1392(592)  | 0.6832(tied to $u_{632}$ ) | 0.6454 | 0.1544 |
| $u_{665}$ | H(69)...H(96)  | 12.1010(415)  | 0.6941(tied to $u_{632}$ ) | 0.6562 | 0.1732 |
| $u_{666}$ | C(53)...H(105) | 12.1980(1710) | 1.0798(tied to $u_{632}$ ) | 1.0419 | 0.2492 |
| $u_{667}$ | C(53)...C(59)  | 11.6311(808)  | 0.5806(tied to $u_{632}$ ) | 0.5427 | 0.6103 |
| $u_{668}$ | H(77)...H(99)  | 11.5086(464)  | 0.7244(tied to $u_{632}$ ) | 0.6865 | 0.8264 |
| $u_{669}$ | C(61)...H(80)  | 12.2561(414)  | 0.4928(tied to $u_{632}$ ) | 0.455  | 0.1648 |
| $u_{670}$ | H(69)...H(103) | 11.7298(948)  | 1.0511(tied to $u_{632}$ ) | 1.0132 | 0.6776 |
| $u_{671}$ | C(61)...H(72)  | 12.1028(402)  | 0.4937(tied to $u_{632}$ ) | 0.4559 | 0.2297 |
| $u_{672}$ | H(77)...H(96)  | 12.3722(827)  | 0.6752(tied to $u_{632}$ ) | 0.6373 | 0.1990 |
| $u_{673}$ | H(69)...H(88)  | 12.1141(637)  | 0.6514(tied to $u_{632}$ ) | 0.6135 | 0.3084 |
| $u_{674}$ | C(45)...H(105) | 12.2806(1719) | 1.0498(tied to $u_{632}$ ) | 1.012  | 0.3280 |
| $u_{675}$ | H(77)...H(107) | 11.9152(782)  | 0.7638(tied to $u_{632}$ ) | 0.7259 | 0.6542 |
| $u_{676}$ | C(29)...H(96)  | 12.5449(218)  | 0.5084(tied to $u_{632}$ ) | 0.4706 | 0.1878 |
| $u_{677}$ | C(37)...H(88)  | 12.5061(385)  | 0.5043(tied to $u_{632}$ ) | 0.4664 | 0.1991 |
| $u_{678}$ | C(37)...C(64)  | 12.5961(219)  | 0.3156(tied to $u_{632}$ ) | 0.2777 | 0.1991 |
| $u_{679}$ | C(29)...C(64)  | 12.5114(231)  | 0.3174(tied to $u_{632}$ ) | 0.2796 | 0.2344 |
| $u_{680}$ | C(37)...H(96)  | 12.6942(577)  | 0.4928(tied to $u_{632}$ ) | 0.4549 | 0.2013 |
| $u_{681}$ | C(29)...H(88)  | 12.4918(476)  | 0.4789(tied to $u_{632}$ ) | 0.441  | 0.2824 |
| $u_{682}$ | C(61)...H(105) | 12.7745(1957) | 0.8733(tied to $u_{632}$ ) | 0.8354 | 0.2583 |
| $u_{683}$ | C(61)...H(103) | 12.7450(2145) | 0.8394(tied to $u_{632}$ ) | 0.8015 | 0.2738 |
| $u_{684}$ | C(45)...H(87)  | 12.3241(1307) | 0.9154(tied to $u_{632}$ ) | 0.8776 | 0.7325 |
| $u_{685}$ | C(61)...H(87)  | 12.4877(1629) | 0.9958(tied to $u_{632}$ ) | 0.9579 | 0.6041 |
| $u_{686}$ | C(45)...H(103) | 12.6381(1794) | 0.8662(tied to $u_{632}$ ) | 0.8284 | 0.4785 |
| $u_{687}$ | C(61)...H(107) | 12.5631(1245) | 0.7841(tied to $u_{632}$ ) | 0.7463 | 0.3119 |
| $u_{688}$ | C(21)...H(104) | 12.8427(50)   | 0.2313(tied to $u_{632}$ ) | 0.1935 | 0.2258 |
| $u_{689}$ | C(53)...H(107) | 12.6052(1063) | 0.7174(1082)               | 0.6919 | 0.5108 |
| $u_{690}$ | C(53)...H(99)  | 12.4467(748)  | 0.6725(tied to $u_{689}$ ) | 0.647  | 0.7673 |
| $u_{691}$ | C(61)...H(99)  | 12.5546(973)  | 0.7578(tied to $u_{689}$ ) | 0.7323 | 0.6238 |
| $u_{692}$ | H(77)...H(104) | 13.2821(439)  | 0.5048(tied to $u_{689}$ ) | 0.4793 | 0.1990 |
| $u_{693}$ | H(69)...H(104) | 13.1204(432)  | 0.5069(tied to $u_{689}$ ) | 0.4814 | 0.2672 |
| $u_{694}$ | C(45)...C(56)  | 13.2471(127)  | 0.3703(tied to $u_{689}$ ) | 0.3448 | 0.2234 |
| $u_{695}$ | C(53)...C(56)  | 13.3551(410)  | 0.3557(tied to $u_{689}$ ) | 0.3302 | 0.2183 |
| $u_{696}$ | C(45)...C(48)  | 13.2125(417)  | 0.3518(tied to $u_{689}$ ) | 0.3263 | 0.2797 |
| $u_{697}$ | C(37)...H(104) | 13.6299(227)  | 0.3269(tied to $u_{689}$ ) | 0.3013 | 0.2346 |
| $u_{698}$ | C(29)...H(104) | 13.5406(254)  | 0.3296(tied to $u_{689}$ ) | 0.3041 | 0.2718 |
| $u_{699}$ | C(45)...H(96)  | 13.8798(185)  | 0.5031(tied to $u_{689}$ ) | 0.4776 | 0.2268 |
| $u_{700}$ | C(53)...H(88)  | 13.8164(328)  | 0.5022(tied to $u_{689}$ ) | 0.4767 | 0.2469 |
| $u_{701}$ | C(53)...C(64)  | 13.9287(201)  | 0.2986(tied to $u_{689}$ ) | 0.2731 | 0.2418 |

|           |                |              |                            |        |        |
|-----------|----------------|--------------|----------------------------|--------|--------|
| $u_{702}$ | C(45)...C(64)  | 13.8536(234) | 0.2993(tied to $u_{689}$ ) | 0.2737 | 0.2735 |
| $u_{703}$ | C(53)...H(96)  | 14.0143(535) | 0.4849(tied to $u_{689}$ ) | 0.4594 | 0.2390 |
| $u_{704}$ | C(45)...H(88)  | 13.8057(502) | 0.4742(tied to $u_{689}$ ) | 0.4487 | 0.3218 |
| $u_{705}$ | C(61)...H(96)  | 14.5747(280) | 0.4336(tied to $u_{689}$ ) | 0.4081 | 0.2522 |
| $u_{706}$ | C(61)...C(64)  | 14.5203(98)  | 0.2256(tied to $u_{689}$ ) | 0.2001 | 0.2807 |
| $u_{707}$ | C(61)...H(88)  | 14.4319(351) | 0.4306(tied to $u_{689}$ ) | 0.405  | 0.3055 |
| $u_{708}$ | C(53)...H(104) | 14.9605(205) | 0.3239(tied to $u_{689}$ ) | 0.2983 | 0.2802 |
| $u_{709}$ | C(45)...H(104) | 14.8804(263) | 0.3256(tied to $u_{689}$ ) | 0.3001 | 0.3137 |
| $u_{710}$ | C(61)...H(104) | 15.5521(103) | 0.2517(tied to $u_{689}$ ) | 0.2262 | 0.3210 |

<sup>a</sup> Estimated standard deviations, obtained in the least squares refinement, are given in parentheses. <sup>b</sup> Amplitudes not refined were fixed at the values obtained using the B3LYP/cc-pVTZ force field.

**Figure S1** Experimental and difference (experimental minus theoretical) molecular-scattering intensities for **1**.

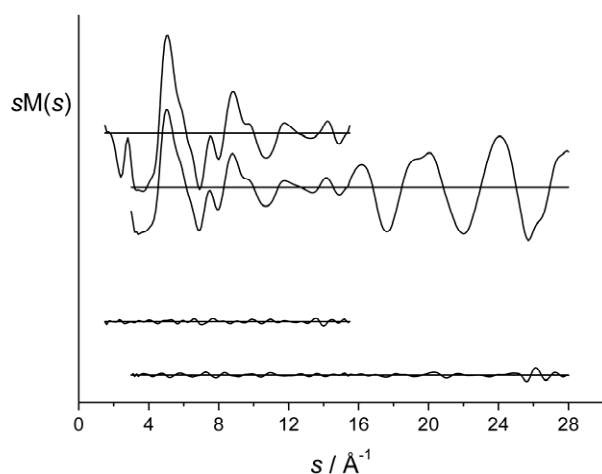

**Figure S2** The molecular structure of the asymmetric unit in the structure of **2** (30% probability ellipsoids).

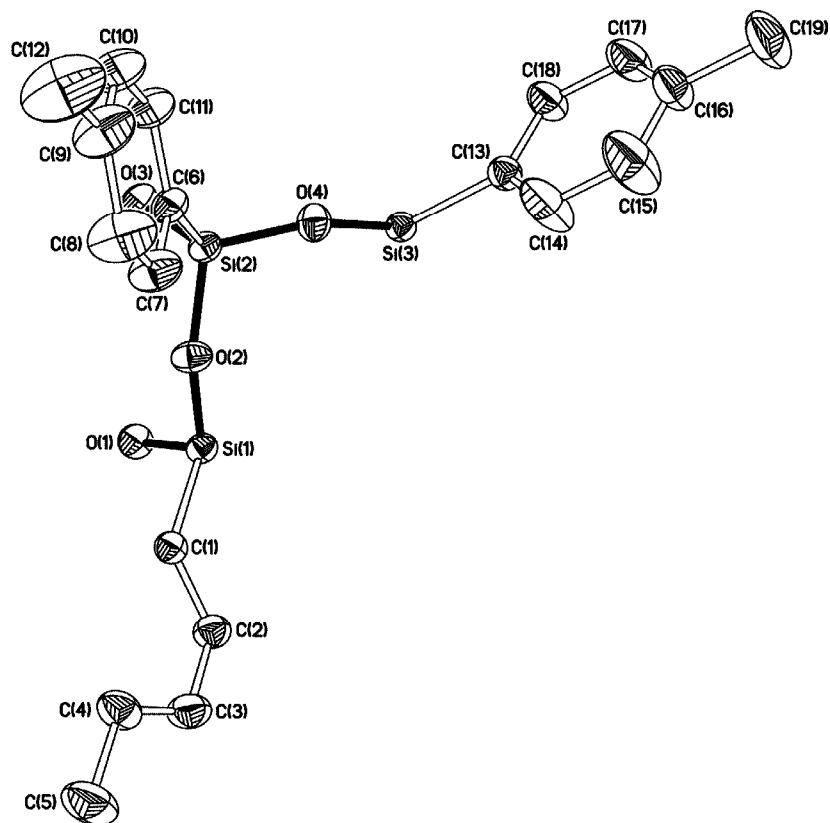



Figure S3 The molecular structure of **3** (30% probability ellipsoids).

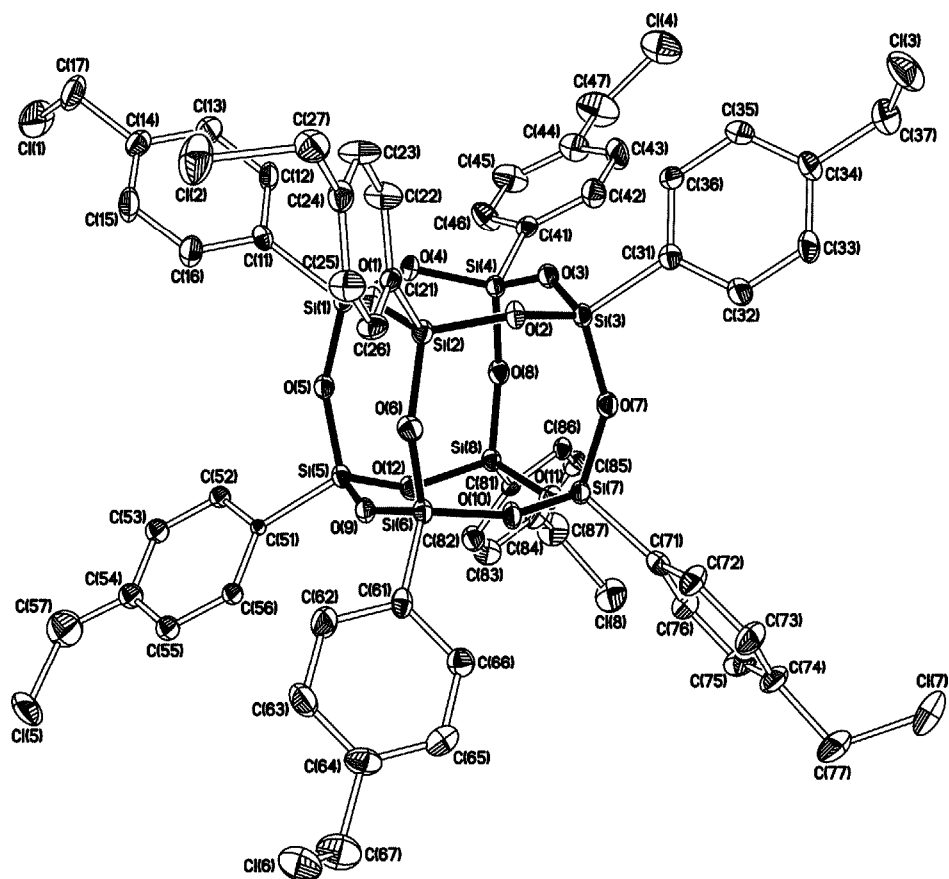

Supplement: c000664e.pdf [file c000664e.pdf]
